1 **The proteome of the malaria plastid organelle, a key anti-parasitic target**

2

3 Michael J. Boucher<sup>1,2</sup>, Sreejoyee Ghosh<sup>2</sup>, Lichao Zhang<sup>3</sup>, Avantika Lal<sup>4,10</sup>, Se Won Jang<sup>5,10</sup>, An

4 Ju<sup>6,11</sup>, Shuying Zhang<sup>6,11</sup>, Xinzi Wang<sup>6,11</sup>, Stuart A. Ralph<sup>8</sup>, James Zou<sup>7,9</sup>, Joshua E. Elias<sup>3</sup>, and

5 Ellen Yeh<sup>1,2,4,9,12\*</sup>

6

7 Departments of <sup>1</sup>Microbiology and Immunology, <sup>2</sup>Biochemistry, <sup>3</sup>Chemical and Systems

8 Biology, <sup>4</sup>Pathology, <sup>5</sup>Computer Science, <sup>6</sup>Bioengineering, and <sup>7</sup>Biomedical Data Science,

9 Stanford University, Stanford, CA 94305, United States of America

10 <sup>8</sup>Department of Biochemistry and Molecular Biology, Bio21 Molecular Science and

11 Biotechnology Institute, The University of Melbourne, Parkville, Vic 3010, Australia

12 <sup>9</sup>Chan Zuckerberg Biohub, San Francisco, CA 94158, United States of America

13 <sup>10</sup>These authors contributed equally

14 <sup>11</sup>These authors contributed equally

15 <sup>12</sup>Lead Contact

16 \*Correspondence: [ellenyeh@stanford.edu](mailto:ellenyeh@stanford.edu)

17 Keywords: malaria, apicoplast, BioID, proteome, neural network

18

## 19 **Summary**

20           The apicoplast is an essential plastid organelle in malaria parasites (*Plasmodium* spp.)  
21 and a validated anti-parasitic target. A major hurdle to uncovering cryptic apicoplast pathways  
22 required for malaria pathogenesis is the lack of an organellar proteome. Here we combine  
23 proximity biotinylation-based proteomics (BioID) and a new machine learning algorithm to  
24 generate the first high-confidence apicoplast proteome consisting of 346 proteins. Critically, the  
25 accuracy of this proteome significantly outperforms previous prediction-based methods. Half of  
26 identified proteins have unknown function, and 77% are predicted to be important for normal  
27 blood-stage growth. We validate the apicoplast localization of a subset of novel proteins and  
28 show that an ATP-binding cassette protein ABCF1 is essential for blood-stage survival and plays  
29 a previously unknown role in apicoplast biogenesis. These findings indicate critical organellar  
30 functions for newly-discovered apicoplast proteins. The apicoplast proteome will be an important  
31 resource for elucidating unique pathways and prioritizing antimalarial drug targets.

## 33 **Introduction**

34           Identification of new antimalarial drug targets is urgently needed to address emerging  
35 resistance to all currently available therapies. However, nearly half of the *Plasmodium*  
36 *falciparum* genome encodes conserved proteins of unknown function (Aurrecochea et al.,  
37 2017), obscuring critical pathways required for malaria pathogenesis. The apicoplast is an  
38 essential, non-photosynthetic plastid found in *Plasmodium* spp. and related apicomplexan  
39 pathogens (McFadden et al., 1996; Kohler et al., 1997). This unusual organelle is an enriched  
40 source of both novel cellular pathways and parasite-specific drug targets (van Dooren and  
41 Striepen, 2013). It was acquired by secondary (i.e., eukaryote-eukaryote) endosymbiosis and has

42 evolutionarily diverged from the primary endosymbiotic organelles found in model organisms.  
43 While some aspects of apicoplast biology are shared with bacteria, mitochondria, and primary  
44 chloroplasts, many are unique to the secondary plastid in this parasite lineage. For example,  
45 novel translocons import apicoplast proteins through specialized membranes derived from  
46 secondary endosymbiosis (Agrawal et al., 2009; Kalanon et al., 2009; Spork et al., 2009;  
47 Agrawal et al., 2013), while the parasite's pared-down metabolism necessitates export of key  
48 metabolites from the apicoplast using as-yet unidentified small molecule transporters (Ralph et  
49 al., 2004; Sheiner et al., 2013).

50         These novel cellular pathways, which are also distinct from human host cells, can be  
51 exploited for antimalarial drug discovery. Indeed, antimalarials that target apicoplast pathways  
52 are currently in use as prophylactics or partner drugs (doxycycline, clindamycin) or have been  
53 tested in clinical trials (fosmidomycin) (Jomaa et al., 1999; Dahl et al., 2006; Dahl and  
54 Rosenthal, 2007; Goodman et al., 2007; Stanway et al., 2009). However, known apicoplast drug  
55 targets have been limited to the handful of pathways identified by homology to plastid-localized  
56 pathways in model organisms. Meanwhile the number of druggable apicoplast targets, including  
57 those in unique secondary plastid pathways, is likely more extensive (Amberg-Johnson et al.,  
58 2017).

59         A major hurdle to identifying novel, parasite-specific pathways and prioritizing new  
60 apicoplast targets is the lack of a well-defined organellar proteome. So far, the apicoplast has not  
61 been isolated in sufficient yield or purity for traditional organellar proteomics. Instead, large-  
62 scale, unbiased identification of apicoplast proteins has relied on bioinformatic prediction of  
63 apicoplast targeting sequences (Zuegge et al., 2001; Foth et al., 2003; Cilingir et al., 2012).  
64 These prediction algorithms identify hundreds of putative apicoplast proteins but contain

65 numerous false positives. Validation of these low-confidence candidate apicoplast proteins is  
66 slow due to the genetic intractability of *P. falciparum* parasites. Unbiased identification of  
67 apicoplast proteins in an accurate and high-throughput manner would significantly enhance our  
68 ability to study novel apicoplast pathways and would suggest new antimalarial drug targets.

69 BioID and other cellular proximity labeling methods are attractive techniques that enable  
70 accurate identification of organellar proteins (Roux et al., 2012). In BioID, a promiscuous biotin  
71 ligase, BirA\*, is fused to a bait protein and catalyzes biotinylation of neighbor proteins in intact  
72 cells. Proximity labeling methods have been used to spatially map the proteomes of subcellular  
73 compartments in diverse organisms, including the *Plasmodium* parasitophorous vacuole and  
74 parasitophorous vacuole membrane (Khosh-Naucke et al., 2018; Schneider et al., 2018),  
75 *Toxoplasma gondii* micronemes and dense granules (Chen et al., 2015; Nadipuram et al., 2016;  
76 Chen et al., 2017), *Trypanosoma brucei* bilobe and basal bodies (Morriswood et al., 2013; Dang  
77 et al., 2017), and human mitochondria (Rhee et al., 2013; Hung et al., 2014), nuclear pore  
78 complexes (Kim et al., 2014), centrosome-cilium interface (Gupta et al., 2015), synaptic clefts  
79 (Loh et al., 2016), and mitochondrial-ER contact sites (Hung et al., 2017). Here, we used BioID  
80 to perform large-scale identification of the *P. falciparum* apicoplast proteome during asexual  
81 blood-stage growth. These proteomic identifications helped us develop an improved neural  
82 network prediction algorithm, PlastNN. We now report a high-confidence, compiled apicoplast  
83 proteome of 346 proteins rich in novel and essential functions.

84

## 85 **Results**

### 86 **The promiscuous biotin ligase BirA\* is functional in the *P. falciparum* apicoplast and** 87 **endoplasmic reticulum**

88 To target the promiscuous biotin ligase BirA\* to the apicoplast, the *N*-terminus of a GFP-  
89 BirA\* fusion protein was modified with the apicoplast-targeting leader sequence from acyl  
90 carrier protein (ACP) (Figure 1A). Since apicoplast proteins transit the parasite endoplasmic  
91 reticulum (ER) en route to the apicoplast (Waller et al., 2000), we also generated a negative  
92 control in which GFP-BirA\* was targeted to the ER via an *N*-terminal signal peptide and a *C*-  
93 terminal ER-retention motif (Figure 1A). Each of these constructs was integrated into an ectopic  
94 locus in Dd2<sup>attB</sup> parasites (Nkrumah et al., 2006) to generate BioID-Ap and BioID-ER parasites  
95 (Figure S1). Live imaging of these parasites confirmed GFP-BirA\* localization to a branched  
96 structure characteristic of the apicoplast or a perinuclear region characteristic of the ER,  
97 respectively (Figure 1B).

98 To test the functionality of the GFP-BirA\* fusions in the apicoplast and ER, we labeled  
99 either untransfected Dd2<sup>attB</sup>, BioID-Ap, or BioID-ER parasites with DMSO or 50  $\mu$ M biotin and  
100 assessed biotinylation by western blotting and fixed-cell fluorescent imaging. As has been  
101 reported (Khosh-Naucke et al., 2018), significant labeling of GFP-BirA\*-expressing parasites  
102 above background was achieved even in the absence of biotin supplementation, suggesting that  
103 the 0.8  $\mu$ M biotin in RPMI growth medium is sufficient for labeling (Figure 1C). Addition of 50  
104  $\mu$ M biotin further increased protein biotinylation. Fluorescence imaging of biotinylated proteins  
105 revealed staining consistent with apicoplast morphology in BioID-Ap parasites and the ER and  
106 other endomembrane structures in BioID-ER parasites (Figure 1D). These results confirm that  
107 GFP-BirA\* fusions are active in the *P. falciparum* apicoplast and ER and can be used for  
108 compartment-specific biotinylation of proteins.

109

110 **Proximity-dependent labeling (BioID) generates an improved apicoplast proteome dataset**

111 For large-scale identification of apicoplast proteins, biotinylated proteins from late-stage  
112 BioID-Ap and BioID-ER parasites were purified using streptavidin-conjugated beads and  
113 identified by mass spectrometry. A total of 728 unique *P. falciparum* proteins were detected in  
114 the apicoplast and/or ER based on presence in at least 2 of 4 biological replicates and at least 2  
115 unique spectral matches in any single mass spectrometry run (Figure 2A and Table S1). The  
116 abundance of each protein in apicoplast and ER samples was calculated by summing the total  
117 MS1 area of all matched peptides and normalizing to the total MS1 area of all detected *P.*  
118 *falciparum* peptides within each mass spectrometry run.

119 To assess the ability of our dataset to distinguish between true positives and negatives,  
120 we then generated control lists of 96 known apicoplast and 451 signal peptide-containing non-  
121 apicoplast proteins based on published localizations and pathways (Table S2). Consistent with an  
122 enrichment of apicoplast proteins in BioID-Ap samples, we observed a clear separation of known  
123 apicoplast and non-apicoplast proteins based on apicoplast:ER abundance ratio (Figure 2A).  
124 Based on the apicoplast:ER abundance ratio, we considered the 187 proteins that were  $\geq 5$ -fold  
125 enriched in apicoplast samples (Figure 2A, dotted line) to be the BioID apicoplast proteome  
126 (Table S1). This dataset included 50 of the 96 positive control proteins for a sensitivity of 52%.  
127 Further, manual inspection of the proteins on the  $\geq 5$ -fold enriched apicoplast list identified 54  
128 true positives and 5 likely false positives (Table S1) for a positive predictive value (PPV; the  
129 estimated fraction of proteins on the list that are true positives) of 92%.

130 To benchmark our dataset against the current standard for large-scale identification of  
131 apicoplast proteins, we compared the sensitivity and PPV of our apicoplast BioID proteome to  
132 those from three published bioinformatic algorithms: PATS (Zuegge et al., 2001), PlasmoAP  
133 (Foth et al., 2003), and ApicoAP (Cilingir et al., 2012) (Table S3). At 52% sensitivity, apicoplast

134 BioID identified fewer known apicoplast proteins than PATS or PlasmoAP, which had  
135 sensitivities of 89% and 84%, respectively, but outperformed the 40% sensitivity of ApicoAP  
136 (Figure 2B). However, we expected that the advantages of apicoplast BioID would be the ability  
137 to detect proteins without classical targeting presequences and its improved discrimination  
138 between true and false positives (Figure 2A). Indeed, bioinformatic algorithms had poor PPVs  
139 ranging from 19%-36% compared to the 92% PPV of BioID (Figure 2C). Even a dataset  
140 consisting only of proteins predicted by all three algorithms achieved a PPV of just 25%.  
141 Consistent with these low PPVs, many proteins predicted by the bioinformatic algorithms are not  
142 enriched in BioID-AP samples, suggesting that many of these proteins are likely to be false  
143 positives (Figure S2). Altogether, identification of apicoplast proteins using BioID provided a  
144 dramatic improvement in prediction performance over bioinformatic algorithms.

145

#### 146 **Apicoplast BioID identifies proteins of diverse functions in multiple subcompartments**

147 To determine whether lumenally targeted GFP-BirA\* exhibited any labeling preferences,  
148 we assessed proteins identified based on the presence of transmembrane domains, their sub-  
149 organellar localization, and their functions. First, we determined the proportion of the 187  
150 proteins identified by apicoplast BioID that are membrane proteins. To ensure that proteins were  
151 not classified as membrane proteins solely due to misclassification of a signal peptide as a  
152 transmembrane domain, we considered a protein to be in a membrane only if it contained at least  
153 one predicted transmembrane domain more than 80 amino acids from the protein's *N*-terminus  
154 (as determined by annotation in PlasmoDB). These criteria suggested that 11% of identified  
155 proteins (20/187) were likely membrane proteins (Figure 3A), indicating that luminal GFP-  
156 BirA\* can label apicoplast membrane proteins.

157           Second, apicoplast proteins may localize to one or multiple sub-compartments defined by  
158 the four apicoplast membranes. It was unclear whether BirA\* targeted to the lumen would label  
159 proteins in non-luminal compartments. Based on literature descriptions, we classified the 96  
160 known apicoplast proteins on our positive control list as either luminal (present in luminal space  
161 or on the innermost apicoplast membrane) or non-luminal (all other sub-compartments) and  
162 determined the proportion that were identified in our dataset. Apicoplast BioID identified 56%  
163 (45/81) of the classified luminal proteins and 33% (5/15) of the non-luminal proteins (Figure  
164 3B), suggesting that the GFP-BirA\* bait used can label both luminal and non-luminal proteins  
165 but may have a preference for luminal proteins (though this difference did not reach statistical  
166 significance).

167           Finally, we characterized the functions of proteins identified by apicoplast BioID. We  
168 grouped positive control apicoplast proteins into functional categories and assessed the  
169 proportion of proteins identified from each functional group (Figure 3C). BioID identified a  
170 substantial proportion (67-100%) of proteins in four apicoplast pathways that are essential in  
171 blood stage and localize to the apicoplast lumen, specifically DNA replication, protein  
172 translation, isoprenoid biosynthesis, and iron-sulfur cluster biosynthesis. Conversely, BioID  
173 identified few proteins involved in heme or fatty acid biosynthesis (0% and 17%, respectively),  
174 which are luminal pathways that are non-essential in the blood-stage and which are likely to be  
175 more abundant in other life cycle stages (Yu et al., 2008; Vaughan et al., 2009; Pei et al., 2010;  
176 Nagaraj et al., 2013; Ke et al., 2014). We achieved moderate coverage of proteins involved in  
177 protein quality control (44%) and redox regulation (38%). Consistent with the reduced labeling  
178 of non-luminal apicoplast proteins, only a small subset (29%) of proteins involved in import of  
179 nuclear-encoded apicoplast proteins were identified. Overall, apicoplast BioID identified soluble



180 and membrane proteins of diverse functions in multiple apicoplast compartments with higher  
181 coverage for luminal proteins required during blood-stage infection.

182

### 183 **The PlastNN algorithm expands the predicted apicoplast proteome with high accuracy**

184 Apicoplast BioID provided the first experimental profile of the blood-stage apicoplast  
185 proteome but is potentially limited in sensitivity due to 1) difficulty in detecting low abundance  
186 peptides in complex mixtures; 2) inability of the promiscuous biotin ligase to access target  
187 proteins that are buried in membranes or protein complexes; or 3) stage-specific protein  
188 expression. Currently-available bioinformatic predictions of apicoplast proteins circumvent these  
189 limitations, albeit at the expense of a low PPV (Figure 2C). We reasoned that increasing the  
190 number of high-confidence apicoplast proteins used to train algorithms could improve the  
191 accuracy of a prediction algorithm while maintaining high sensitivity. In addition, inclusion of  
192 exported proteins that traffic through the ER, which are common false positives in previous  
193 prediction algorithms, would also improve our negative training set.

194 We used our list of previously known apicoplast proteins (Table S2) as well as newly-  
195 identified apicoplast proteins from BioID (Table S1) to construct a positive training set of 205  
196 apicoplast proteins (Table S4). As a negative training set, we used our previous list of 451 signal  
197 peptide-containing non-apicoplast proteins (Table S2). For each of the 656 proteins in the  
198 training set, we calculated the frequencies of all 20 canonical amino acids in a 50 amino acid  
199 region immediately following the predicted signal peptide cleavage site. In addition, given that  
200 apicoplast proteins have a characteristic transcriptional profile in blood-stage parasites (Bozdech  
201 et al., 2003) and that analysis of transcriptional profile has previously enabled identification of  
202 apicoplast proteins in the related apicomplexan *Toxoplasma gondii* (Sheiner et al., 2011), we

203 obtained transcript levels at 8 time points during intraerythrocytic development from previous  
204 RNA-Seq data (Bartfai et al., 2010). Altogether, each protein was represented by a vector of  
205 dimension 28 (20 amino acid frequencies plus 8 transcript levels). These 28-dimensional vectors  
206 were used as inputs to train a neural network with 3 hidden layers (Figure 4A and Table S5). Six-  
207 fold cross-validation was used for training, wherein the training set was divided into 6 equal  
208 parts (folds) to train 6 separate models. Each time, 5 folds were used to train the model and 1  
209 fold to measure the performance of the trained model.

210 We named this model PlastNN (ApicoPLAST Neural Network). PlastNN recognized  
211 apicoplast proteins with a cross-validation accuracy of  $96 \pm 3\%$  (mean  $\pm$  s.d. across 6 models),  
212 along with sensitivity of  $95 \pm 5\%$ , and PPV of  $94 \pm 4\%$  (Figure 4B). This performance was  
213 higher than logistic regression on the same dataset (average accuracy = 91%). Combining the  
214 transcriptome features and the amino acid frequencies improves performance: the same neural  
215 network architecture with amino acid frequencies alone as input resulted in a lower average  
216 accuracy of 91%, while using transcriptome data alone resulted in an average accuracy of 90%  
217 (Table S6). Comparison of the performance of PlastNN to existing prediction algorithms  
218 indicates that PlastNN distinguishes apicoplast and non-apicoplast proteins with higher accuracy  
219 than any previous prediction method (Figure 4C). To identify new apicoplast proteins, PlastNN  
220 was used to predict the apicoplast status of 450 predicted signal peptide-containing proteins that  
221 were not in our positive or negative training sets. Since PlastNN is composed of 6 models, we  
222 designated proteins as “apicoplast” if plastid localization was predicted by  $\geq 4$  of the 6 models.  
223 PlastNN predicts 118 out of the 450 proteins to be targeted to the apicoplast (Table S7).  
224 Combining these results with those from apicoplast BioID (Table S1) and with experimental

225 localization of proteins from the literature (Table S2) yielded a compiled proteome of 346  
226 putative nuclear-encoded apicoplast proteins (Table S8).

227

### 228 **The apicoplast proteome contains a multitude of novel and essential proteins**

229 To determine whether candidate apicoplast proteins from this study have the potential to  
230 reveal unexplored parasite biology or are candidate antimalarial drug targets, we assessed the  
231 novelty and essentiality of the identified proteins. We found that substantial fractions of the  
232 BioID and PlastNN proteomes (49% and 71%, respectively) and 50% of the compiled apicoplast  
233 proteome represented proteins that could not be assigned to an established apicoplast pathway  
234 and therefore might be involved in novel organellar processes (Figure 5A). Furthermore, we  
235 identified orthologs of identified genes in the 150 genomes present in the OrthoMCL database  
236 (Chen et al., 2006): 39% of the compiled apicoplast proteome were unique to apicomplexan  
237 parasites, with 58% of these proteins found only in *Plasmodium* spp. (Figure 5B). This analysis  
238 indicates that many of the proteins identified are significantly divergent from proteins in their  
239 metazoan hosts.

240 Consistent with the critical role of the apicoplast in parasite biology, a recent genome-  
241 scale functional analysis of genes in the rodent malaria parasite *P. berghei* showed that numerous  
242 apicoplast proteins are essential for blood-stage survival (Bushell et al., 2017). Using this  
243 dataset, we found that 77% of those proteins in the compiled apicoplast proteome that had *P.*  
244 *berghei* homologs analyzed by PlasmogEM were important for normal blood-stage parasite  
245 growth (Figure 5C). Notably, of 49 proteins that were annotated explicitly with “unknown  
246 function” in their gene description and for which essentiality data are available, 38 are important  
247 for normal parasite growth, indicating that the high rate of essentiality for apicoplast proteins is

248 true of both previously known and newly discovered proteins. Overall, these data suggest that we  
249 have identified dozens of novel proteins that are likely critical for apicoplast biology.

250

### 251 **Localization of candidate proteins confirms accuracy of protein identification**

252 To confirm the utility of our approaches, we experimentally determined the localization  
253 of several candidate apicoplast proteins. A rhomboid protease homolog ROM7 and 3 conserved  
254 *Plasmodium* proteins of unknown function (PF3D7\_0521400, PF3D7\_1472800, and  
255 PF3D7\_0721100) were each overexpressed as a C-terminal GFP fusions and tested in apicoplast  
256 localization assays. First, we detected the apicoplast-dependent cleavage of each candidate as a  
257 marker of its import. Most nuclear-encoded apicoplast proteins are proteolytically processed to  
258 remove N-terminal targeting sequences following successful import into the apicoplast (Waller et  
259 al., 1998; van Dooren et al., 2002). This processing is abolished in parasites rendered  
260 “apicoplast-minus” by treatment with an inhibitor (actinonin) to cause apicoplast loss (Yeh and  
261 DeRisi, 2011; Amberg-Johnson et al., 2017). Comparison of protein molecular weight in  
262 apicoplast-intact and -minus parasites showed that ROM7, PF3D7\_0521400, and  
263 PF3D7\_1472800 (but not PF3D7\_0721100) were cleaved in an apicoplast-dependent manner  
264 (Figure 6A).

265 Second, we localized the candidate-GFP fusions by live fluorescence microscopy and  
266 assessed their mislocalization in apicoplast-minus parasites. Consistent with apicoplast  
267 localization, ROM7-GFP, PF3D7\_0521400-GFP, and PF3D7\_1472800-GFP localized to  
268 branched structures characteristic of the apicoplast (Figure 6B). In apicoplast-minus parasites,  
269 these proteins mislocalized to diffuse puncta (Figure 6B), as previously observed for apicoplast  
270 proteins (Yeh and DeRisi, 2011). Interestingly, while in untreated parasites PF3D7\_0721100-  
271 GFP localized to a few large bright puncta not previously described for any apicoplast protein,

272 this protein also relocated to the typical numerous diffuse puncta seen for genuine apicoplast  
273 proteins in apicoplast-minus parasites (Figure 6B). Taken together, these data validate the  
274 apicoplast localization of ROM7, PF3D7\_0521400, and PF3D7\_1472800. Though targeting  
275 peptide cleavage and the characteristic branched structure were not detected for  
276 PF3D7\_0721100, the mislocalization of PF3D7\_0721100-GFP to puncta characteristic of  
277 apicoplast-minus parasites indicates that this protein may also be a true apicoplast protein.

278 We next focused on four ATP-binding cassette (ABC) proteins in our dataset: ABCB3,  
279 ABCB4, ABCB7, and ABCF1. ABCB-family proteins are small molecule membrane  
280 transporters, while ABCF-family proteins do not contain transmembrane domains and are  
281 typically involved in translation regulation (Kerr, 2004; Dean and Annilo, 2005). While this  
282 manuscript was in preparation, the apicoplast localization of ABCB3 and ABCB4 were  
283 confirmed in *P. falciparum* and *P. berghei*, respectively (Sayers et al., 2018). To assess  
284 localization and function of ABCB7 and ABCF1, we modified their endogenous loci to contain a  
285 C-terminal triple HA tag and tandem copies of a tetracycline repressor (TetR)-binding RNA  
286 aptamer in the 3' UTR of either gene (Figure S3) (Goldfless et al., 2014; Ganesan et al., 2016).  
287 We performed immunofluorescence analysis (IFA) to determine whether ABCB7-HA and  
288 ABCF1-HA colocalized with the apicoplast marker ACP. ABCF1-HA exhibited clear co-  
289 localization with ACP, confirming its apicoplast localization (Figure 6C). ABCB7-HA localized  
290 to elongated structures that may be indicative of an intracellular organelle but rarely co-localized  
291 with ACP, indicating a primarily non-apicoplast localization (Figure 6C). Overall, of 8  
292 candidates of unknown localization at the start of this study, we identified 6 confirmed apicoplast  
293 proteins, 1 likely apicoplast protein, and 1 potential false positive.

294

## 295 **A novel apicoplast protein ABCF1 is essential and required for organelle biogenesis**

296 We determined the essentiality and knockdown phenotype of a newly identified  
297 apicoplast protein, ABCF1, taking advantage of the TetR-binding aptamers inserted into its 3'  
298 UTR as described above. In the presence of anhydrotetracycline (ATc), binding of the aptamer  
299 by a TetR-DOZI repressor is inhibited and ABCF1 is expressed. Upon removal of ATc, repressor  
300 binding blocks gene expression (Goldfless et al., 2014; Ganesan et al., 2016). Knockdown of  
301 ABCF1 caused robust parasite growth inhibition (Figure 7A-B). Significantly, growth inhibition  
302 of ABCF1-deficient parasites was reversed in the presence of isopentenyl pyrophosphate (IPP)  
303 (Figure 7B), which bypasses the need for a functional apicoplast (Yeh and DeRisi, 2011),  
304 indicating that ABCF1 has an essential apicoplast function. Essential apicoplast functions can be  
305 placed into two broad categories: those involved in organelle biogenesis, and those involved  
306 solely in IPP production. Disruption of proteins required for organelle biogenesis causes  
307 apicoplast loss, while disruption of proteins involved in IPP production does not (Yeh and  
308 DeRisi, 2011; Wu et al., 2015; Amberg-Johnson et al., 2017). We determined whether  
309 knockdown of ABCF1 caused apicoplast loss by assessing 1) absence of the apicoplast genome,  
310 2) loss of transit peptide processing of nuclear-encoded apicoplast proteins, and 3) relocation  
311 of apicoplast proteins to puncta. Indeed, the apicoplast:nuclear genome ratio drastically  
312 decreased in ABCF1 knockdown parasites beginning 1 cycle after knockdown (Figure 7C), and  
313 western blot showed that the apicoplast protein ClpP was not processed in ABCF1 knockdown  
314 parasites (Figure 7D). Furthermore, IFA of the apicoplast marker ACP confirmed redistribution  
315 from an intact plastid to diffuse cytosolic puncta (Figure 7E). In contrast to ABCF1, a similar  
316 knockdown of ABCB7 caused no observable growth defect after four growth cycles despite  
317 significant reduction in protein levels (Figure S4). Together, these results show that ABCF1 is a

318 novel and essential apicoplast protein with a previously unknown function in organelle  
319 biogenesis.

320

## 321 **Discussion**

322 Since the discovery of the apicoplast, identification of its proteome has been a pressing  
323 priority. We report the first large-scale proteomic analysis of the apicoplast in blood-stage  
324 malaria parasites, which identified 187 candidate proteins with 52% sensitivity and 92% PPV. A  
325 number of groups have also profiled parasite-specific membrane compartments using proximity  
326 biotinylation but observed contamination with proteins in or trafficking through the ER,  
327 preventing accurate identification of these proteomes without substantial manual curation and  
328 validation (Chen et al., 2015; Nadipuram et al., 2016; Chen et al., 2017; Khosh-Naucke et al.,  
329 2018; Schnider et al., 2018). This background labeling is expected since proteins traffic through  
330 the ER en route to several parasite-specific compartments, including the parasitophorous  
331 vacuole, host cytoplasm, food vacuole, and invasion organelles. The high specificity of our  
332 apicoplast BioID proteome depended on 1) the use of a control cell line expressing ER-localized  
333 GFP-BirA\* to detect enrichment of apicoplast proteins from background ER labeling and 2)  
334 strong positive and negative controls to set an accurate threshold. We suspect a similar strategy  
335 to detect nonspecific ER background may also improve the specificity of proteomic datasets for  
336 other parasite-specific, endomembrane-derived compartments.

337 Leveraging our successful proteomic analysis, we used these empirical data as an updated  
338 training set to also improve computational predictions of apicoplast proteins. PlastNN identified  
339 an additional 118 proteins with 95% sensitivity and 94% PPV. Although two previous prediction  
340 algorithms, PATS and ApicoAP, also applied machine learning to the problem of transit peptide

341 prediction, we reasoned that their low accuracy arose from the small training sets used  
342 (ApicoAP) and the use of cytosolic as well as endomembrane proteins in the negative training set  
343 (PATS). By using an expanded positive training set based on proteomic data and limiting our  
344 training sets to only signal peptide-containing proteins, we developed an algorithm with higher  
345 sensitivity than BioID and higher accuracy than previous apicoplast protein prediction models.  
346 Moreover, PlastNN suggests testable hypotheses regarding the contribution of sequence-based  
347 and temporal regulation to protein trafficking in the ER.

348 Overall, we have compiled a high-confidence apicoplast proteome of 346 proteins that  
349 are rich in novel and essential functions (Figure 5A and 5C). This proteome likely represents a  
350 majority of soluble apicoplast proteins, since 1) our bait for proximity biotinylation targeted to  
351 the lumen and 2) most soluble proteins use canonical targeting sequences that can be predicted.  
352 Further improvements to the apicoplast proteome will focus on expanding the coverage of  
353 membrane proteins, which more often traffic via distinctive routes (Mullin et al., 2006; Parsons  
354 et al., 2007). Performing proximity biotinylation with additional bait proteins may identify such  
355 atypical apicoplast proteins. In the current study, our bait was an inert fluorescent protein  
356 targeted to the apicoplast lumen to minimize potential toxicity of the construct. The success of  
357 this apicoplast GFP bait gives us confidence to attempt more challenging baits, including  
358 proteins localized to sub-organellar membrane compartments or components of the protein  
359 import machinery. Performing apicoplast BioID in liver and mosquito stages may also define  
360 apicoplast functions in these stages.

361 The apicoplast proteome will be a valuable resource for uncovering cryptic pathways  
362 required for malaria pathogenesis and prioritizing new antimalarial drug targets. Already several  
363 candidates of biological interest based on their biochemical function annotations were validated.



364 We demonstrated an unexpected role for the ATP-binding cassette protein *Pf*ABCF1 in  
365 apicoplast biogenesis. An *E. coli* homolog, EttA, regulates translation initiation in response to  
366 cellular ATP levels (Boel et al., 2014; Chen et al., 2014). Mammalian and yeast ABCF1  
367 homologs also interact with ribosomes and regulate translation (Vazquez de Aldana et al., 1995;  
368 Marton et al., 1997; Tyzack et al., 2000; Paytubi et al., 2009). By analogy, *Pf*ABCF1 may  
369 regulate the prokaryotic translation machinery in the apicoplast, although the mechanistic basis  
370 for the severe defect in parasite replication upon loss of *Pf*ABCF1 is unclear. We also validated  
371 *Pf*ROM7 as an apicoplast-localized rhomboid protease. This protein may have a role in  
372 apicoplast protein import, as a rhomboid protease was recently identified as a component of  
373 symbiont-derived ERAD-like machinery (SELMA) that transports proteins across a novel  
374 secondary plastid membrane in diatoms (Lau et al., 2016). Neither *Pf*ABCF1 nor *Pf*ROM7 had  
375 known roles in the apicoplast prior to their identification in this study, underscoring the utility of  
376 unbiased approaches to identify new organellar proteins.

377 A recent study aimed at identifying apicoplast membrane transporters highlights the  
378 difficulty in identifying novel apicoplast functions in the absence of a high-confidence proteome  
379 (Sayers et al., 2018). Taking advantage of the tractable genetics in murine *Plasmodium* species,  
380 Sayers et al. screened 27 candidates in *P. berghei* for essentiality and apicoplast localization.  
381 Following >50 transfections, 3 essential and 4 non-essential apicoplast membrane proteins were  
382 identified. One newly-identified essential apicoplast membrane protein was then validated to be  
383 required for apicoplast biogenesis in *P. falciparum*. In contrast, even though our study was not  
384 optimized to identify membrane proteins, the combination of BioID and PlastNN identified 2  
385 known apicoplast transporters, 4 of the new apicoplast membrane protein homologs, and 56  
386 additional proteins predicted to contain at least one transmembrane domain. A focused screen of

387 higher quality candidates in *P. falciparum* is likely to be more rapid and yield the most relevant  
388 biology. Our high-confidence apicoplast proteome will streamline these labor-intensive screens,  
389 focusing on strong candidates for downstream biological function elucidation. As methods for  
390 analyzing gene function in *P. falciparum* parasites continue to improve, this resource will  
391 become increasingly valuable for characterizing unknown organellar pathways.

392

## 393 **Materials and Methods**

### 394 **Parasite growth**

395 *Plasmodium falciparum* Dd2<sup>attB</sup> (Nkrumah et al., 2006) (MRA-843) were obtained from MR4.  
396 NF54<sup>Cas9+T7 Polymerase</sup> parasites (Sidik et al., 2016) were a gift from Jacquin Niles. Parasites were  
397 grown in human erythrocytes (2% hematocrit) obtained from the Stanford Blood Center in RPMI  
398 1640 media (Gibco) supplemented with 0.25% Albumax II (Gibco), 2 g/L sodium bicarbonate,  
399 0.1 mM hypoxanthine (Sigma), 25 mM HEPES, pH 7.4 (Sigma), and 50 µg/L gentamicin (Gold  
400 Biotechnology) at 37°C, 5% O<sub>2</sub>, and 5% CO<sub>2</sub>.

401

### 402 **Vector construction**

403 Oligonucleotides were purchased from the Stanford Protein and Nucleic Acid facility or IDT.  
404 gBlocks were ordered from IDT. Molecular cloning was performed using In-Fusion cloning  
405 (Clontech) or Gibson Assembly (NEB). Primer and gBlock sequences are available in Table S9.

406 To generate the plasmid pRL2-ACP<sub>L</sub>-GFP for targeting transgenes to the apicoplast, the  
407 first 55 amino acids from ACP were PCR amplified with primers MB015 and MB016 and were  
408 inserted in front of the GFP in the pRL2 backbone (Balabaskaran Nina et al., 2011) via the  
409 AvrII/BsiWI sites. To generate pRL2-ACP<sub>L</sub>-GFP-BirA\* for targeting a GFP-BirA\* fusion to the

410 apicoplast, GFP was amplified from pLN-ENR-GFP using primers MB087 and MB088 and  
411 BirA\* was amplified from pcDNA3.1 mycBioID (Addgene 35700) (Roux et al., 2012) using  
412 primers MB089 and MB090. These inserts were simultaneously cloned into BsiWI/AflIII-  
413 digested pRL2-ACP<sub>L</sub>-GFP to generate pRL2-ACP<sub>L</sub>-GFP-BirA\*. To generate pRL2-SS-GFP-  
414 BirA\*-SDEL for targeting GFP-BirA\* to the ER, SS-GFP-BirA\*-SDEL was PCR amplified  
415 from pRL2-ACP<sub>L</sub>-GFP-BirA\* using primers MB093 and MB094 and was cloned into  
416 AvrII/AflIII-digested pRL2-ACP<sub>L</sub>-GFP. For GFP-tagging to confirm localization of proteins  
417 identified by apicoplast BioID, full-length genes were amplified from parasite cDNA with  
418 primers as described in Table S9 and were cloned into the AvrII/BsiWI sites of pRL2-ACP<sub>L</sub>-  
419 GFP.

420 For CRISPR-Cas9-based editing of endogenous ABCB7 and ABCF1 loci, sgRNAs were  
421 designed using the eukaryotic CRISPR guide RNA/DNA design tool (<http://grna.ctegd.uga.edu/>).  
422 To generate a linear plasmid for CRISPR-Cas9-based editing, left homology regions were  
423 amplified with primers MB256 and MB257 (ABCB7) or MB260 and MB261 (ABCF1) and right  
424 homology regions were amplified with MB258 and MB259 (ABCB7) or MB262 and MB263  
425 (ABCF1). For each gene, a gBlock containing the recoded coding sequence C-terminal of the  
426 CRISPR cut site and a triple HA tag was synthesized with appropriate overhangs for Gibson  
427 Assembly. This fragment was simultaneously cloned into the FseI/ApaI sites of the linear  
428 plasmid pSN054-V5. Next, the appropriate right homology region and a gBlock containing the  
429 sgRNA expression cassette were simultaneously cloned into the AscI/I-SceI sites of the resultant  
430 vector to generate the plasmids pSN054-ABCB7-TetR-DOZI and pSN054-ABCF1-TetR-DOZI.

431

432 **Parasite transfection**

433 Transfections were carried out using variations on the spontaneous uptake method (Deitsch et al.,  
434 2001; Wagner et al., 2014). In the first variation, 100 µg of each plasmid was ethanol  
435 precipitated and resuspended in 30 µL sterile TE buffer and was added to 150 µL packed RBCs  
436 resuspended to a final volume of 400 µL in cytomix. The mixture was transferred to a 0.2 cm  
437 electroporation cuvette (Bio-Rad) and was electroporated at 310 V, 950 µF, infinity resistance in  
438 a Gene Pulser Xcell electroporation system (Bio-Rad) before allowing parasites to invade. Drug  
439 selection was initiated 3 days after transfection. Alternatively, 50 µg of each plasmid was ethanol  
440 precipitated and resuspended in 0.2 cm electroporation cuvettes in 100 µL TE buffer, 100 µL  
441 RPMI containing 10 mM HEPES-NaOH, pH 7.4, and 200 µL packed uninfected RBCs. RBCs  
442 were pulsed with 8 square wave pulses of 365 V x 1 ms separated by 0.1 s. RBCs were allowed  
443 to reseal for 1 hour in a 37°C water bath before allowing parasites to invade. Drug selection was  
444 initiated 4 days after transfection. All transfectants were selected with 2.5 µg/mL Blasticidin S  
445 (Research Products International). Additionally, BioID-ER parasites were selected with 125  
446 µg/mL G418 sulfate (Corning) and ABCB7 and ABCF1 TetR-DOZI parasites were grown in the  
447 presence of 500 nM ATc. Transfections for generating BioID constructs (Figure 1) and  
448 expression of GFP-tagged candidates (Figure 6) were performed in the Dd2<sup>attB</sup> background.  
449 Transfections for CRISPR editing were performed with the NF54<sup>Cas9+T7 Polymerase</sup> background and  
450 clonal parasite lines were obtained by limiting dilution.

451 Correct modification of transfectant genomes was confirmed by PCR. Briefly, 200 µL of  
452 2% hematocrit culture was pelleted and resuspended in water, and 2 µL of the resulting lysate  
453 was used as template for PCR with Phusion polymerase (NEB). PCR targets and their  
454 corresponding primer pairs are as follows: integrated *attL* site, p1 + p2; integrated *attR* site,  
455 MW001 + MW003; unintegrated *attB* site, MW004 + MW003; ABCB7 unintegrated left

456 homology region (LHR), MB269 + MB270; ABCB7 integrated LHR, MB269 + MB255;  
457 ABCB7 unintegrated right homology region (RHR), MB281 + MB278; ABCB7 integrated RHR,  
458 MB276 + MB 278; ABCF1 unintegrated LHR, MB271 + MB272; ABCF1 integrated LHR, MB  
459 271 + MB255; ABCF1 unintegrated RHR, MB282 + MB283; ABCF1 integrated RHR, MB276  
460 + MB283.

461

#### 462 **Biotin labeling**

463 To label parasites for analysis by streptavidin blot, fixed imaging, or mass spectrometry, cultures  
464 of majority ring stage parasites were treated with 50  $\mu$ M biotin or with a DMSO vehicle only  
465 control. Cultures were harvested for analysis 16 hours later as majority trophozoites and  
466 schizonts.

467

#### 468 **Actinonin treatment and IPP rescue**

469 To generate apicoplast-minus parasites, ring-stage cultures were treated with 10  $\mu$ M actinonin  
470 (Sigma) and 200  $\mu$ M IPP (Isoprenoids, LLC) and cultured for 3 days before analysis.

471

#### 472 **Western blotting**

473 Parasites were separated from RBCs by lysis in 0.1% saponin and were washed in PBS. Parasite  
474 pellets were resuspended in PBS containing 1X NuPAGE LDS sample buffer with 50 mM DTT  
475 and were boiled at 95°C for 10 minutes before separation on NuPAGE or Bolt Bis-Tris gels and  
476 transfer to nitrocellulose. Membranes were blocked in 0.1% Hammarsten casein (Affymetrix) in  
477 0.2X PBS with 0.01% sodium azide. Antibody incubations were performed in a 1:1 mixture of  
478 blocking buffer and TBST (Tris-buffered saline with Tween-20; 10 mM Tris, pH 8.0, 150 mM

479 NaCl, 0.25 mM EDTA, 0.05% Tween 20). Blots were incubated with primary antibody for either  
480 1 hour at room temperature or at 4°C overnight at the following dilutions: 1:20,000 mouse- $\alpha$ -  
481 GFP JL-8 (Clontech 632381); 1:20,000 rabbit- $\alpha$ -*Plasmodium* aldolase (Abcam ab207494);  
482 1:1000 rat- $\alpha$ -HA 3F10 (Sigma 11867423001); 1:4000 rabbit- $\alpha$ -PfClpP (El Bakkouri et al., 2010).  
483 Blots were washed once in TBST and were incubated for 1 hour at room temperature in a  
484 1:10,000 dilution of the appropriate secondary antibody: IRDye 800CW donkey- $\alpha$ -rabbit; IRDye  
485 680LT goat- $\alpha$ -mouse; IRDye 680LT goat- $\alpha$ -rat (LI-COR Biosciences). For detection of  
486 biotinylated proteins, blots were incubated with 1:1000 IRDye 680RD streptavidin for one hour  
487 at room temperature. Blots were washed three times in TBST and once in PBS before imaging  
488 on a LI-COR Odyssey imager.

489

## 490 **Microscopy**

491 For live imaging, parasites were settled onto glass-bottom microwell dishes (MatTek P35G-1.5-  
492 14-C) or Lab-Tek II chambered coverglass (ThermoFisher 155409) in PBS containing 0.4%  
493 glucose and 2  $\mu$ g/mL Hoechst 33342 stain (ThermoFisher H3570).

494 For fixed imaging of biotinylated proteins in cells, biotin-labeled parasites were  
495 processed as in Tonkin et al. (Tonkin et al., 2004) with modifications. Briefly, parasites were  
496 washed in PBS and were fixed in 4% paraformaldehyde (Electron Microscopy Science 15710)  
497 and 0.015% glutaraldehyde (Electron Microscopy Sciences 16019) in PBS for 30 minutes. Cells  
498 were washed once in PBS, resuspended in PBS, and allowed to settle onto poly-L-lysine-coated  
499 coverslips (Corning) for 60 minutes. Coverslips were then washed once with PBS, permeabilized  
500 in 0.1% Triton X-100 in PBS for 10 minutes, and washed twice more in PBS. Cells were treated  
501 with 0.1 mg/mL sodium borohydride in PBS for 10 minutes, washed once in PBS, and blocked

502 in 3% BSA in PBS. To visualize biotin-labeled proteins, coverslips were incubated with 1:1000  
503 AlexaFluor 546-conjugated streptavidin (ThermoFisher S11225) for one hour followed by three  
504 washes in PBS. No labeling of GFP was necessary, as these fixation conditions preserve intrinsic  
505 GFP fluorescence (Tonkin et al., 2004). Coverslips were mounted onto slides with ProLong Gold  
506 antifade reagent with DAPI (ThermoFisher) and were sealed with nail polish prior to imaging.

507 For immunofluorescence analysis, parasites were processed as above except that fixation  
508 was performed with 4% paraformaldehyde and 0.0075% glutaraldehyde in PBS for 20 minutes  
509 and blocking was performed with 5% BSA in PBS. Following blocking, primary antibodies were  
510 used in 5% BSA in PBS at the following concentrations: 1:500 rabbit- $\alpha$ -ACP (Gallagher and  
511 Prigge, 2010); 1:100 rat- $\alpha$ -HA 3F10 (Sigma 11867423001). Coverslips were washed three times  
512 in PBS, incubated with goat- $\alpha$ -rat 488 (ThermoFisher A-11006) and donkey- $\alpha$ -rabbit 568  
513 (ThermoFisher A10042) secondary antibodies at 1:3000, and washed three times in PBS prior to  
514 mounting as above.

515 Live and fixed cells were imaged with a 100X, 1.4 NA objective on an Olympus IX70  
516 microscope with a DeltaVision system (Applied Precision) controlled with SoftWorx version  
517 4.1.0 and equipped with a CoolSnap-HQ CCD camera (Photometrics). With the exception of  
518 images presented in Figure 1B, which were taken in a single z-plane, images were captured as a  
519 series of z-stacks separated by 0.2  $\mu$ m intervals, deconvolved, and displayed as maximum  
520 intensity projections. Brightness and contrast were adjusted in Fiji (ImageJ) for display purposes.

521

## 522 **Biotin pulldowns, mass spectrometry, and data analysis**

523 Biotin-labeled parasites were harvested by centrifugation and were released from the host RBC  
524 by treatment with 0.1% saponin/PBS. Parasites were washed twice more with 0.1% saponin/PBS

525 followed by PBS and were either used immediately for analysis or were stored at -80°C. Parasite  
526 pellets were resuspended in RIPA buffer [50 mM Tris-HCl, pH 7.4, 150 mM NaCl, 0.1% SDS,  
527 0.5% sodium deoxycholate, 1% Triton X-100, 1 mM EDTA] containing a protease inhibitor  
528 cocktail (Pierce) and were lysed on ice for 30 minutes with occasional pipetting. Insoluble debris  
529 was removed by centrifugation at 16,000 xg for 15 minutes at 4°C. Biotinylated proteins were  
530 captured using High Capacity Streptavidin Agarose beads (Pierce) for 2 hours at room  
531 temperature. Beads were then washed three times with RIPA buffer, three times with SDS wash  
532 buffer [50 mM Tris-HCl, pH 7.4, 150 mM NaCl, 2% SDS], six times with urea wash buffer [50  
533 mM Tris-HCl, pH 7.4, 150 mM NaCl, 8 M urea], and three times with 100 mM ammonium  
534 bicarbonate. Proteins were reduced with 5 mM DTT for 60 minutes at 37°C followed by  
535 treatment with 14 mM iodoacetamide (Pierce) at room temperature for 45 minutes. Beads were  
536 washed once with 100 mM ammonium bicarbonate and were digested with 10 µg/mL trypsin  
537 (Promega) at 37°C overnight. The following day, samples were digested with an additional 5  
538 µg/mL trypsin for 3-4 hours. Digested peptides were separated from beads by addition of either  
539 35% or 50% final concentration acetonitrile, and peptides were dried on a SpeedVac prior to  
540 desalting with C18 stage tips.

541 Desalted peptides were resuspended in 0.1% formic acid and analyzed by online capillary  
542 nanoLC-MS/MS. Samples were separated on an in-house made 20 cm reversed phase column  
543 (100 µm inner diameter, packed with ReproSil-Pur C18-AQ 3.0 µm resin (Dr. Maisch GmbH))  
544 equipped with a laser-pulled nanoelectrospray emitter tip. Peptides were eluted at a flow rate of  
545 400 nL/min using a two-step linear gradient including 2-25% buffer B in 70 min and 25-40% B  
546 in 20 min (buffer A: 0.2% formic acid and 5% DMSO in water; buffer B: 0.2% formic acid and  
547 5% DMSO in acetonitrile) in an Eksigent ekspert nanoLC-425 system (AB Sciex). Peptides were



548 then analyzed using a LTQ Orbitrap Elite mass spectrometer (Thermo Scientific). Data  
549 acquisition was executed in data dependent mode with full MS scans acquired in the Orbitrap  
550 mass analyzer with a resolution of 60000 and m/z scan range of 340-1600. The top 20 most  
551 abundant ions with intensity threshold above 500 counts and charge states 2 and above were  
552 selected for fragmentation using collision- induced dissociation (CID) with isolation window of  
553 2 m/z, normalized collision energy of 35%, activation Q of 0.25 and activation time of 5 ms. The  
554 CID fragments were analyzed in the ion trap with rapid scan rate. In additional runs, the top 10  
555 most abundant ions with intensity threshold above 500 counts and charge states 2 and above  
556 were selected for fragmentation using higher energy collisional dissociation (HCD) with  
557 isolation window of 2 m/z, normalized collision energy of 35%, and activation time of 25 ms.  
558 The HCD fragments were analyzed in the Orbitrap with a resolution of 15000. Dynamic  
559 exclusion was enabled with repeat count of 1 and exclusion duration of 30 s. The AGC target  
560 was set to 1000000, 50000, and 5000 for full FTMS scans, FTMSn scans and ITMSn scans,  
561 respectively. The maximum injection time was set to 250 ms, 250 ms, and 100 ms for full FTMS  
562 scans, FTMSn scans and ITMSn scans, respectively.

563 The resulting spectra were searched against a “target-decoy” sequence database (Elias  
564 and Gygi, 2007) consisting of the PlasmoDB protein database (release 32, released April 19,  
565 2017), the Uniprot human database (released February 2, 2015), and the corresponding reversed  
566 sequences using the SEQUEST algorithm (version 28, revision 12). The parent mass tolerance  
567 was set to 50 ppm and the fragment mass tolerance to 0.6 Da for CID scans, 0.02 Da for HCD  
568 scans. Enzyme specificity was set to trypsin. Oxidation of methionines was set as variable  
569 modification and carbamidomethylation of cysteines was set as static modification. Peptide

570 identifications were filtered to a 1% peptide false discovery rate using a linear discriminator  
571 analysis (Huttlin et al., 2010). Precursor peak areas were calculated for protein quantification.

572

### 573 **Apicoplast protein prediction algorithms and positive/negative control apicoplast proteins**

574 To generate updated lists of PATS-predicted apicoplast proteins, nuclear-encoded *P. falciparum*  
575 3D7 proteins (excluding pseudogenes) from PlasmoDB version 28 (released March 30, 2016)  
576 were used to check for existence of a putative bipartite apicoplast targeting presequence using  
577 the artificial neural network predictor PATS (Zuegge et al., 2001).

578 Updated PlasmoAP-predicted apicoplast proteins were identified using the PlasmoDB  
579 version 32 proteome (released April 19, 2017) by first checking for the presequence of a  
580 predicted signal peptide using the neural network version of SignalP version 3.0 (Bendtsen et al.,  
581 2004), and were considered positive if they had a *D-score* above the default cutoff. The SignalP  
582 *C-score* was used to predict the signal peptide cleavage position, and the remaining portion of  
583 the protein was inspected for presence of a putative apicoplast transit peptide using the rules  
584 described for PlasmoAP (Foth et al., 2003), implemented in a Perl script.

585 *P. falciparum* proteins predicted to localize to the apicoplast by ApicoAP were accessed  
586 from the original paper (Cilingir et al., 2012). Genes predicted to encode pseudogenes were  
587 excluded.

588 A positive control list of 96 high-confidence apicoplast proteins (Table S2) was generated  
589 based on either (1) published localization of that protein in *Plasmodium* parasites or *Toxoplasma*  
590 *gondii* or (2) presence of that protein in either the isoprenoid biosynthesis or fatty acid  
591 biosynthesis/utilization pathways. To generate a negative control list of potential false positives,  
592 nuclear-encoded proteins (excluding pseudogenes) predicted to contain a signal peptide were

593 identified as above and 451 of these proteins were designated as negative controls based on GO  
594 terms, annotations, and the published literature.

595

### 596 **Feature extraction for neural network**

597 To generate the positive training set for PlastNN, we took the combined list of previously known  
598 apicoplast proteins (Table S2) and apicoplast proteins identified by BioID (Table S1) and  
599 removed proteins that (1) were likely false positives based on manual inspection; (2) were likely  
600 targeted to the apicoplast without the canonical bipartite *N*-terminal leader sequence; or (3) did  
601 not contain a predicted signal peptide based on the SignalP 3.0 *D*-score. This yielded a final  
602 positive training set of 205 proteins (Table S4). The negative training set was the previously  
603 generated list of known non-apicoplast proteins (Table S2). The test set for PlastNN consisted of  
604 450 proteins predicted to have a signal peptide by the SignalP 3.0 *D*-score that were not in the  
605 positive or negative training sets.

606 For each protein in our training and test sets, we took the 50 amino acids immediately  
607 after the end of the predicted signal peptide (according to the SignalP 3.0 *C*-score) and calculated  
608 the frequency of each of the 20 amino acids in this sequence. The length of 50 amino acids was  
609 chosen empirically by trying lengths from 20-100; highest accuracy was obtained using 50.

610 Scaled FPKM values at 8 time points during intraerythrocytic development were obtained from  
611 published RNA-Seq (Bartfai et al., 2010). By combining the amino acid frequencies with the 8  
612 transcriptome values, we represented each protein in our training and test sets by a feature vector  
613 of length 28.

614

### 615 **Neural network training and cross-validation**

616 To train the model, the 205 positive and 451 negative training examples were combined and  
617 randomly shuffled. The training set was divided into 6 equal folds, each containing 109 or 110  
618 examples. We trained models using 6-fold cross-validation; that is, we trained 6 separate models  
619 with the same architecture, each using 5 of the 6 folds for training and then using the one  
620 remaining fold as a cross-validation set to evaluate performance. Accuracy, sensitivity, and PPV  
621 are calculated on this cross-validation set. The final reported values of accuracy, sensitivity, and  
622 PPV are the average and standard deviation over all 6 models. When predicting on the test set,  
623 the final predictions are generated by a majority vote of all 6 models.

624 Neural networks were trained using the RMSProp optimization algorithm with a learning  
625 rate of 0.0001. Tensorflow version 1.4.1 was used to build and train the neural network. Logistic  
626 regression on the same dataset was carried out using the caret package (version 6.0-77) in R  
627 version 3.3.3.

628

### 629 **Accuracy, sensitivity, and positive predictive value (PPV) calculations**

630 The BioID apicoplast proteome and the predicted proteomes from PATS, PlasmoAP, ApicoAP,  
631 and PlastNN were analyzed for accuracy, sensitivity, and PPV according to the following  
632 formulae:

$$633 \text{ Accuracy} = (TP + TN)/(TP + FP + TN + FN)$$

$$634 \text{ Sensitivity} = TP/(TP + FN)$$

$$635 \text{ PPV} = TP/(TP + FP)$$

636 Abbreviations: TP, true positive; TN, true negative; FP, false positive; FN, false negative.

637 Because none of the 451 negative control proteins were identified in our 187-protein BioID  
638 proteome, for the purposes of calculating PPV in Figure 2C we identified 5 likely false positives  
639 by manual inspection of these 187 proteins and added these to the negative control list.

640

#### 641 **Protein Novelty Analysis**

642 Proteins in the apicoplast proteome were manually categorized for having a potentially novel  
643 function based on PlasmoDB version 33 (released June 30, 2017) gene product annotations.  
644 Gene products with annotations that could clearly assign a given protein to an established  
645 cellular pathway were labeled as “Known Pathway;” gene products with a descriptive annotation  
646 that did not clearly suggest a cellular pathway were labeled as “Annotated Gene Product,  
647 Unknown Function;” and gene products that explicitly contained the words “unknown function”  
648 were labeled as “Unknown Function.”

649

#### 650 **OrthoMCL Orthology Analysis**

651 To analyze the conservation of candidate apicoplast proteins identified by apicoplast BioID,  
652 OrthoMCL ortholog group IDs were obtained from PlasmoDB. Based on OrthoMCL version 5  
653 (released July 23, 2015), each ortholog group was then categorized as being present only in  
654 *Plasmodium* spp., only in Apicomplexa, or present in at least one organism outside of the  
655 Apicomplexa.

656

#### 657 **Gene Essentiality Analysis**

658 Essentiality data for *P. berghei* orthologs of *P. falciparum* genes encoding apicoplast proteins  
659 were accessed from the original PlasmoGEM manuscript (Bushell et al., 2017).

660

### 661 **Parasite Growth Time Courses**

662 Sorbitol-synchronized ABCB7 and ABCF1 TetR-DOZI parasites were washed multiple times to  
663 remove residual ATc and were returned to culture medium containing 500 nM ATc, 200  $\mu$ M IPP  
664 (Isoprenoids, LLC), or no supplements. Samples for growth assays, DNA isolation, or western  
665 blotting were harvested every other day when the majority of parasites were trophozoites and  
666 schizonts. For growth assays, parasites were fixed in 1% paraformaldehyde in PBS and were  
667 stored at 4°C until completion of the time course. Samples were then stained with 50 nM  
668 YOYO-1 and parasitemia was analyzed on a BD Accuri C6 flow cytometer. Samples for DNA  
669 isolation and western blotting were treated with 0.1% saponin in PBS to release parasites from  
670 the erythrocyte, washed in PBS, and stored at -80°C until analysis.

671

### 672 **Quantitative PCR**

673 Total parasite DNA was isolated from time course samples using the DNeasy Blood & Tissue  
674 Kit (Qiagen). Quantitative PCR was performed using Power SYBR Green PCR Master Mix  
675 (Thermo Fisher) with primers CHT1 F and CHT1 R targeting the nuclear gene chitinase or TufA  
676 F and TufA R targeting the apicoplast gene elongation factor Tu (0.15  $\mu$ M final concentration  
677 each primer) (Yeh and DeRisi, 2011). Quantitative PCR was performed on an Applied  
678 Biosystems 7900HT Real-Time PCR System with the following thermocycling conditions:  
679 Initial denaturation 95°C/10 minutes; 35 cycles of 95°C/1 minute, 56°C/1 minute; 65°C/1  
680 minute; final extension 65°C/10 minutes. Relative quantification of each target was performed  
681 using the  $\Delta\Delta C_t$  method.

682

## 683 **Data and Software Availability**

684 Raw mass spectrometry data are available via the Chorus repository (<https://chorusproject.org/>)  
685 with project identifier 1440. Code related to the development of the PlastNN algorithm is  
686 available at <https://github.com/sjang92/plastNN>.

687

## 688 **Acknowledgements**

689 We thank Jacquin Niles for providing the NF54<sup>Cas9+T7 Polymerase</sup> cell line and pSN054-V5 plasmid,  
690 Sean Prigge for  $\alpha$ -ACP antibody, and Walid Houry for  $\alpha$ -ClpP antibody. We also thank Julian  
691 Lutze for assistance with molecular cloning of candidate apicoplast genes.

692

## 693 **Financial Disclosure**

694 Funding for this work was provided by National Institutes of Health grants K08 AI097239 and  
695 DP5 OD012119 (E.Y.), a Burroughs Wellcome Fund Career Award for Medical Scientists  
696 (E.Y.), the Chan Zuckerberg Biohub Investigator Program (E.Y. and J.Z.), a Stanford Bio-X  
697 Interdisciplinary Initiatives Seed Grant (E.Y. and J.E.E.), an NSF CRII grant (J.Z.), a National  
698 Health and Medical Research Council RD Wright Biomedical fellowship (S.A.R.), and a  
699 William R. and Sara Hart Kimball Stanford Graduate Fellowship (M.J.B.).

700

## 701 **Author Contributions**

702 Conceptualization, M.J.B. and E.Y.; Software, A.L., S.J.W., A.J., S.Z., X.W., J.Z. and S.A.R.;  
703 Investigation, M.J.B., and S.G.; Resources, L.Z., J.E.E., and S.A.R.; Writing – Original Draft,  
704 M.J.B. and E.Y.; Writing – Review & Editing, M.J.B., S.G., L.Z., A.L., S.W.J., A.J., S.Z., X.W.,

705 S.A.R., J.Z., J.E.E., and E.Y.; Supervision, E.Y., J.E.E., and J.Z.; Funding Acquisition, E.Y.,

706 J.E.E., J.Z., and S.A.R.

707

708 **Figures and Legends**

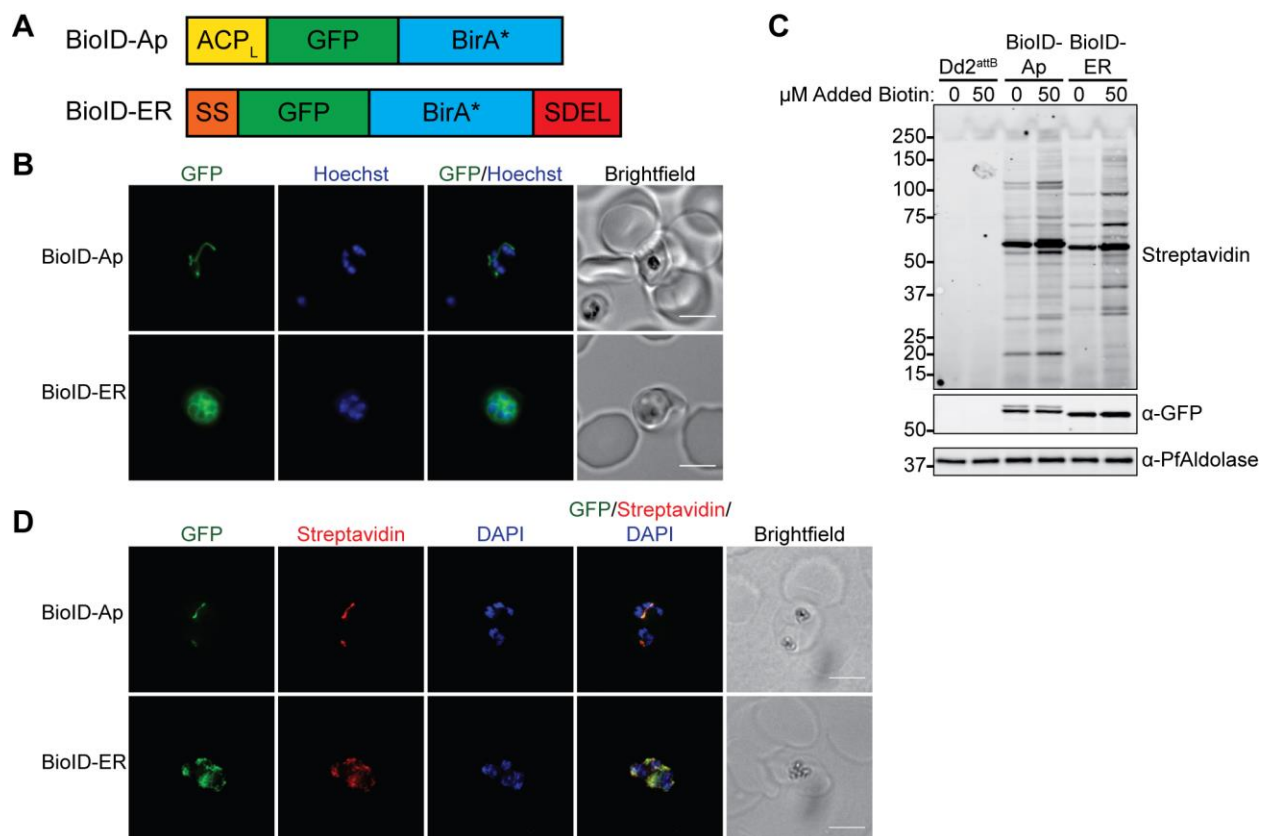

709

710 **Figure 1. The promiscuous biotin ligase BirA\* biotinylates proteins in the *P. falciparum***

711 **apicoplast and ER.** (A) Schematic (not to scale) of constructs for apicoplast- and ER-targeting

712 of GFP-BirA\*. ACP<sub>L</sub>, ACP leader sequence; SS, signal sequence; SDEL, ER-retention motif.

713 (B) Live cell imaging of Hoechst-stained BioID-Ap and BioID-ER parasites. Scale bars, 5 μm.

714 (C) Western blot of untreated and biotin-labeled Dd2<sup>attB</sup>, BioID-Ap, and BioID-ER parasites. (D)

715 Fixed cell imaging of biotinylated proteins in biotin-labeled BioID-Ap and BioID-ER parasites.

716 Scale bars, 5 μm. See also Figure S1.

717



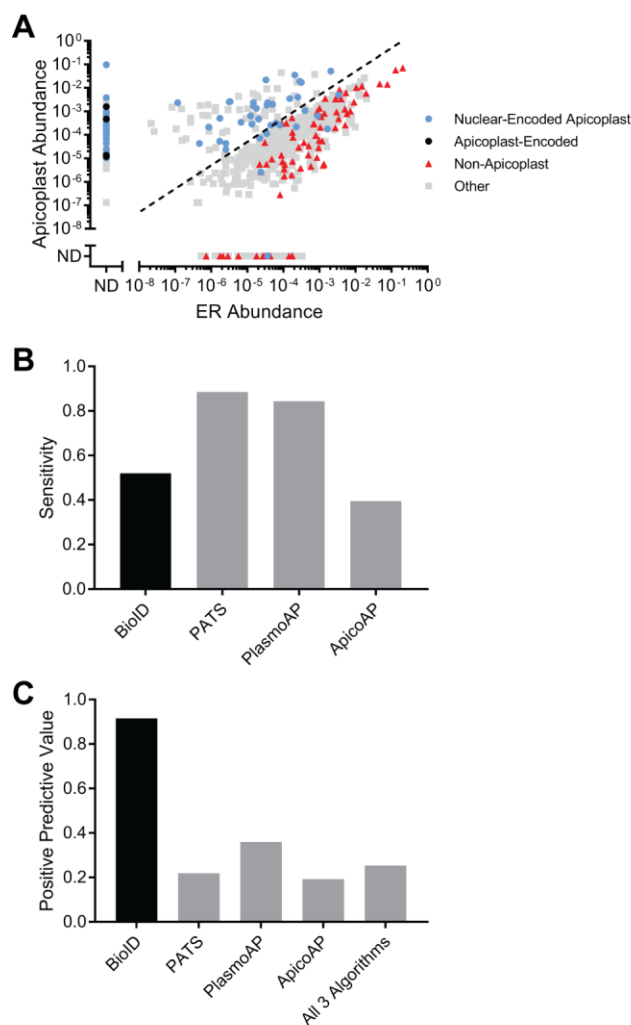

718

719 **Figure 2. Accurate, unbiased identification of apicoplast proteins using BioID. (A)**

720 Abundances of 728 proteins identified by mass spectrometry in BioID-Ap and BioID-ER

721 parasites. Protein abundances were calculated by summing the total MS1 area of all matched

722 peptides and normalized by the total summed intensity of all *P. falciparum* peptides matched.

723 Dotted line represents 5-fold apicoplast:ER enrichment. ND, not detected. (B) Sensitivities of

724 BioID, PATS, PlasmoAP, and ApicoAP based on identification of 96 known apicoplast proteins.

725 (C) PPV of BioID, PATS, PlasmoAP, ApicoAP, and a dataset consisting of proteins predicted to

726 localize to the apicoplast by all three bioinformatic algorithms. Calculated as the number of true

727 positives divided by the total number of true positives and false positives. See also Figure S2,  
728 Table S1, Table S2, and Table S3.  
729

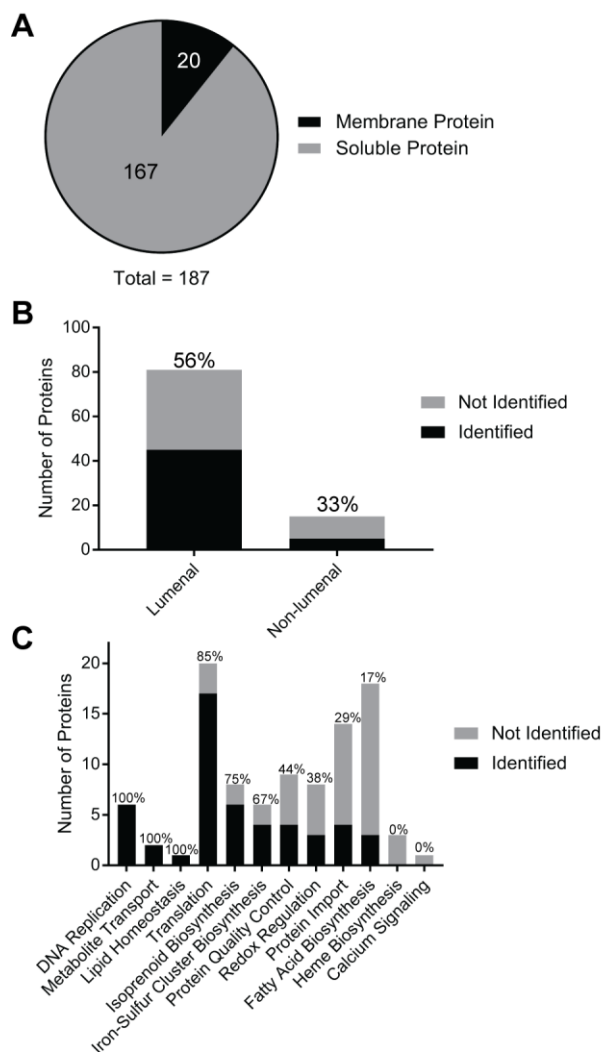

730  
731 **Figure 3. Diversity of protein labeling by apicoplast BioID.** (A) Fraction of proteins identified  
732 by apicoplast BioID that are predicted to localize to a membrane. Proteins were considered  
733 “membrane” if they had at least one transmembrane domain annotated in PlasmoDB ending >80  
734 amino acids from the annotated *N*-terminus. (B) Number of luminal and non-luminal positive  
735 controls identified. Percentages above bars indicate the percentage of known proteins from each

736 category identified. (C) Number of proteins from established apicoplast pathways identified.  
 737 Percentages above bars indicate the percentage of known proteins from each pathway identified.  
 738 See also Table S1 and Table S2.  
 739

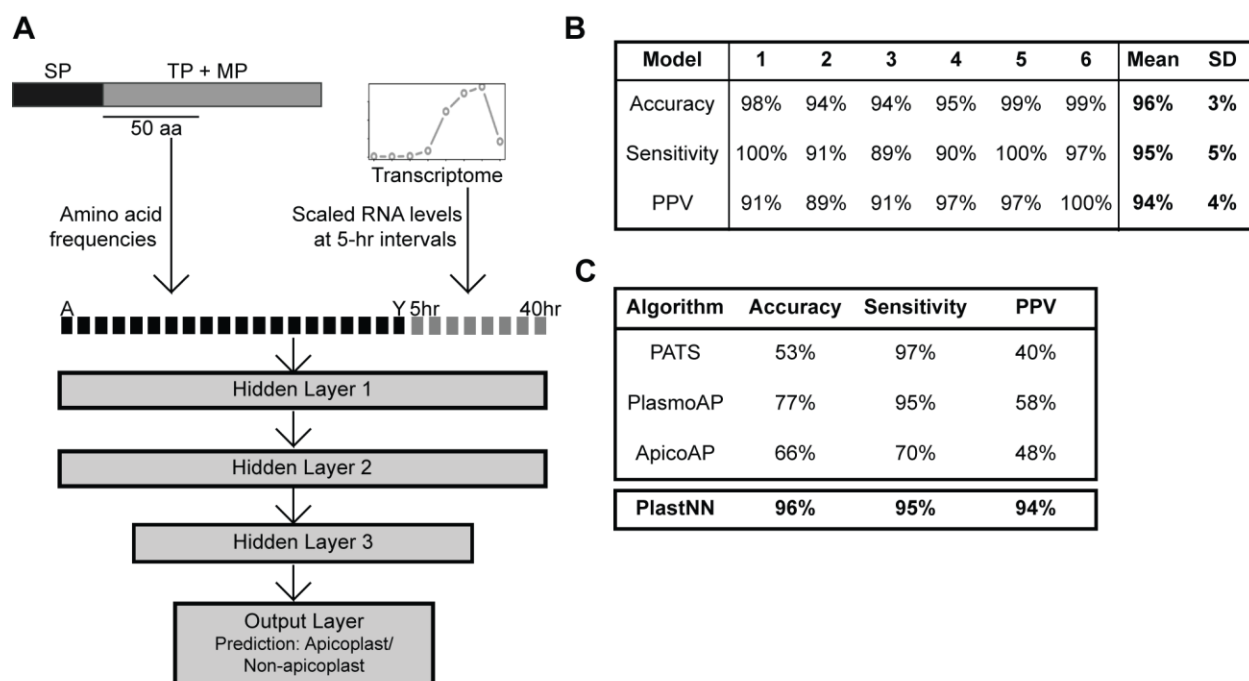

740  
 741 **Figure 4. Improved prediction of apicoplast proteins using the PlastNN algorithm.** (A)  
 742 Schematic of the PlastNN algorithm. For each signal peptide-containing protein, a region of 50  
 743 amino acids immediately following the signal peptide cleavage site was selected and the  
 744 frequencies of the 20 canonical amino acids in this region were calculated, resulting in a vector  
 745 of length 20. Scaled RNA levels of the gene encoding the protein at 8 time points were added,  
 746 resulting in a 28-dimensional vector representing each protein. This was used as input to train a  
 747 neural network with 3 hidden layers, resulting in a prediction of whether the protein is targeted to  
 748 the apicoplast or not. (B) Table showing the performance of the 6 models in PlastNN. Each  
 749 model was trained on 5/6th of the training set and cross-validated on the remaining 1/6th. Values  
 750 shown are accuracy, sensitivity, and PPV on the cross-validation set. The final values reported

751 are the average and standard deviation over all 6 models. (C) Comparison of accuracy,  
752 sensitivity, and PPV for three previous algorithms and PlastNN. See also Table S2, Table S3,  
753 Table S4, Table S5, Table S6, Table S7.  
754

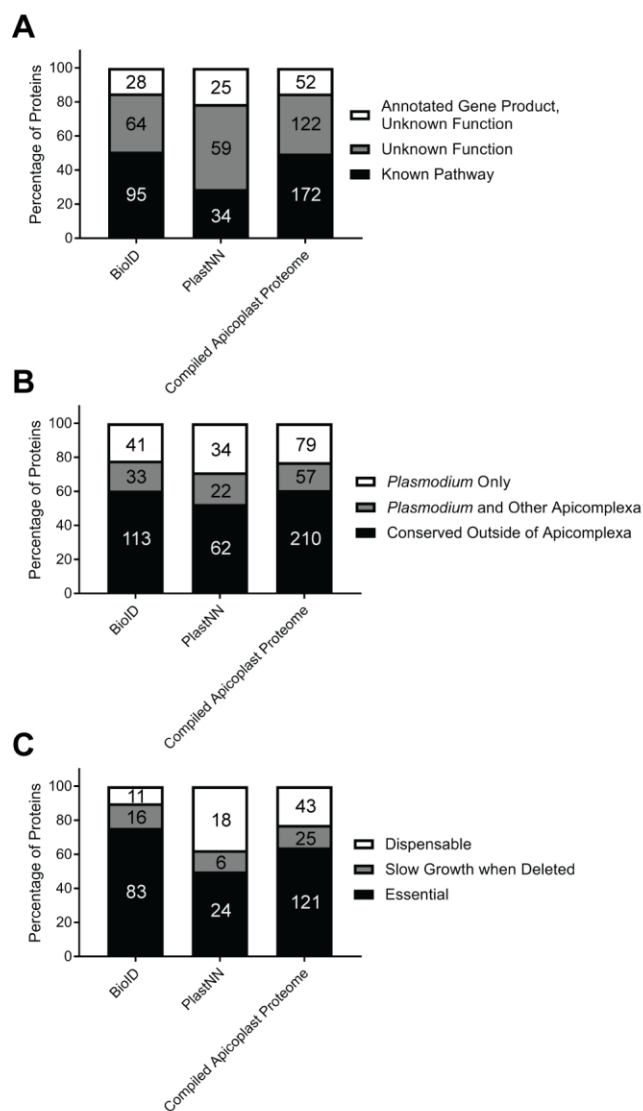

755  
756 **Figure 5. Apicoplast BioID identifies novel and essential proteins.** (A) Percentage of proteins  
757 identified that have annotated gene products but unknown function, that have gene products  
758 annotated explicitly with “unknown function,” or that have annotated gene products and function  
759 in a known cellular pathway. (B) Percentage of proteins identified that are *Plasmodium*- or

760 Apicomplexa-specific based on OrthoMCL orthology analysis. (C) Percentage of proteins  
761 identified that are essential, cause slow growth when deleted, or are dispensable based on  
762 PlasmogEM essentiality data of *P. berghei* orthologs. Absolute number of proteins identified as  
763 indicated. See also Table S1, Table S7, and Table S8.  
764

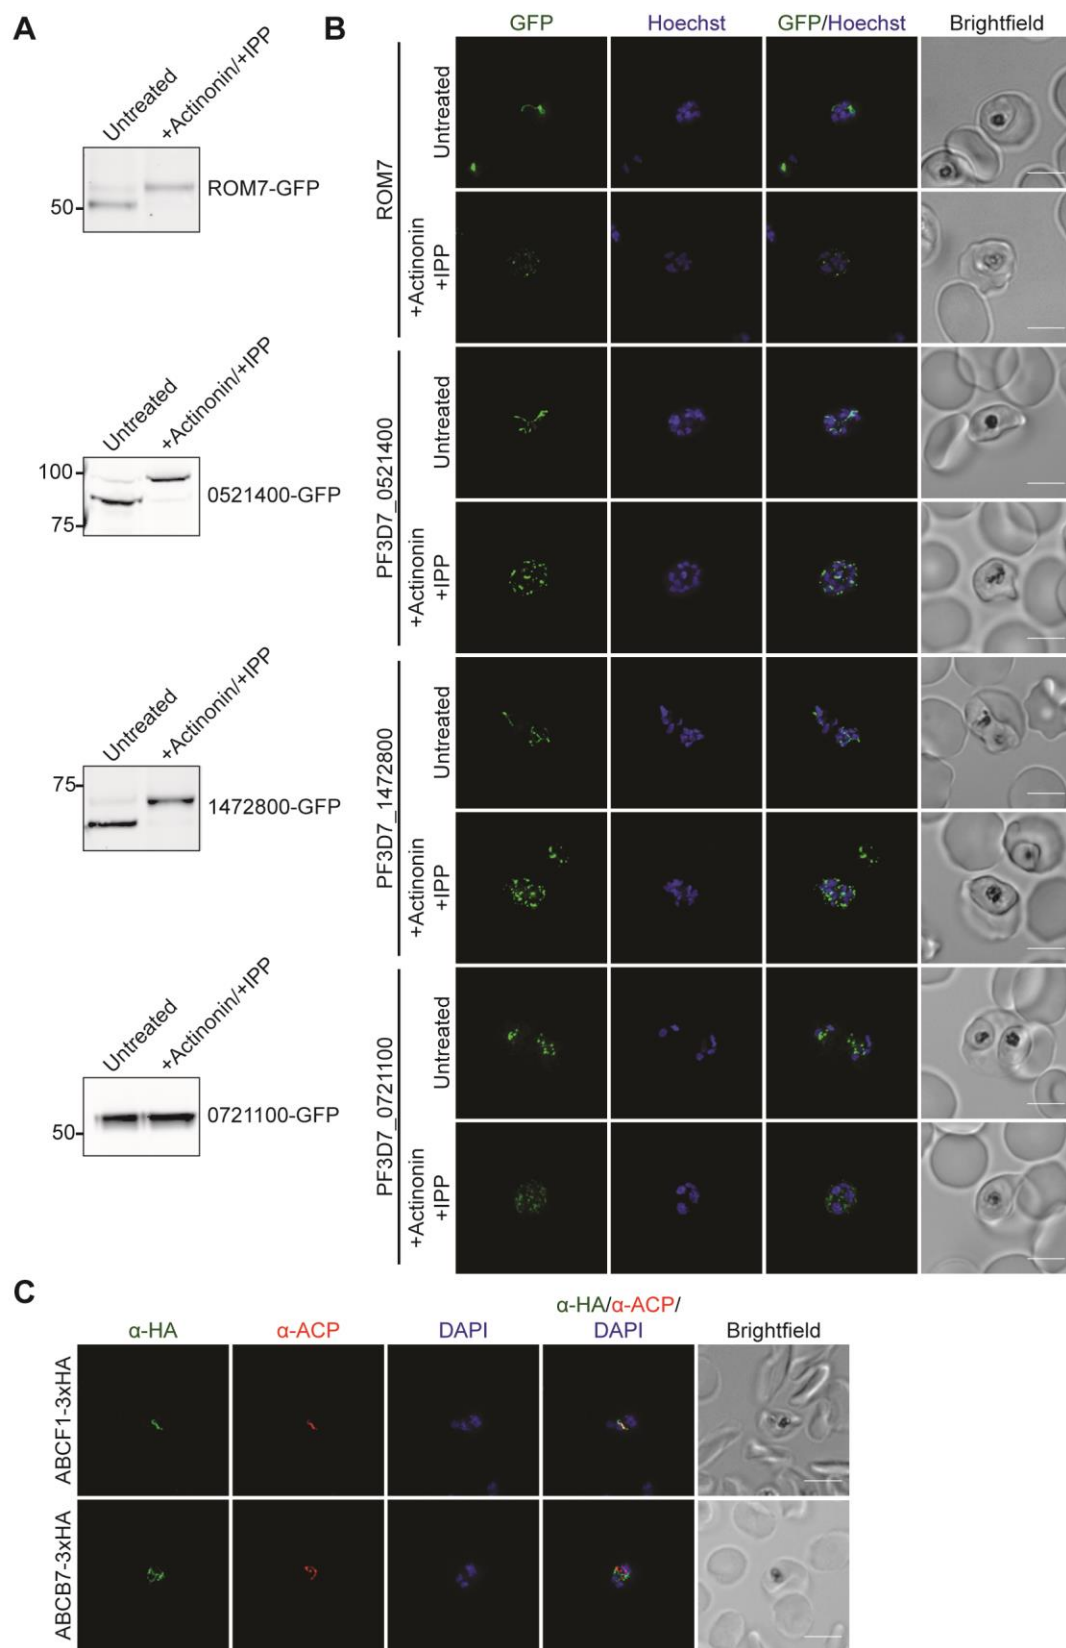

766 **Figure 6. Localization of candidate apicoplast proteins identified in this study.** (A) Transit  
767 peptide processing assay for C-terminally GFP-tagged candidates. Ring-stage parasites were  
768 either untreated or treated with 10  $\mu$ M actinonin/200  $\mu$ M IPP for 3 days and protein processing  
769 was assessed by western blot. (B) Live cell localization of GFP-tagged candidates in apicoplast-  
770 intact and -minus parasites. (C) IFAs of endogenously triple HA-tagged ABCB7 and ABCF1.  
771 See also Figure S3.  
772

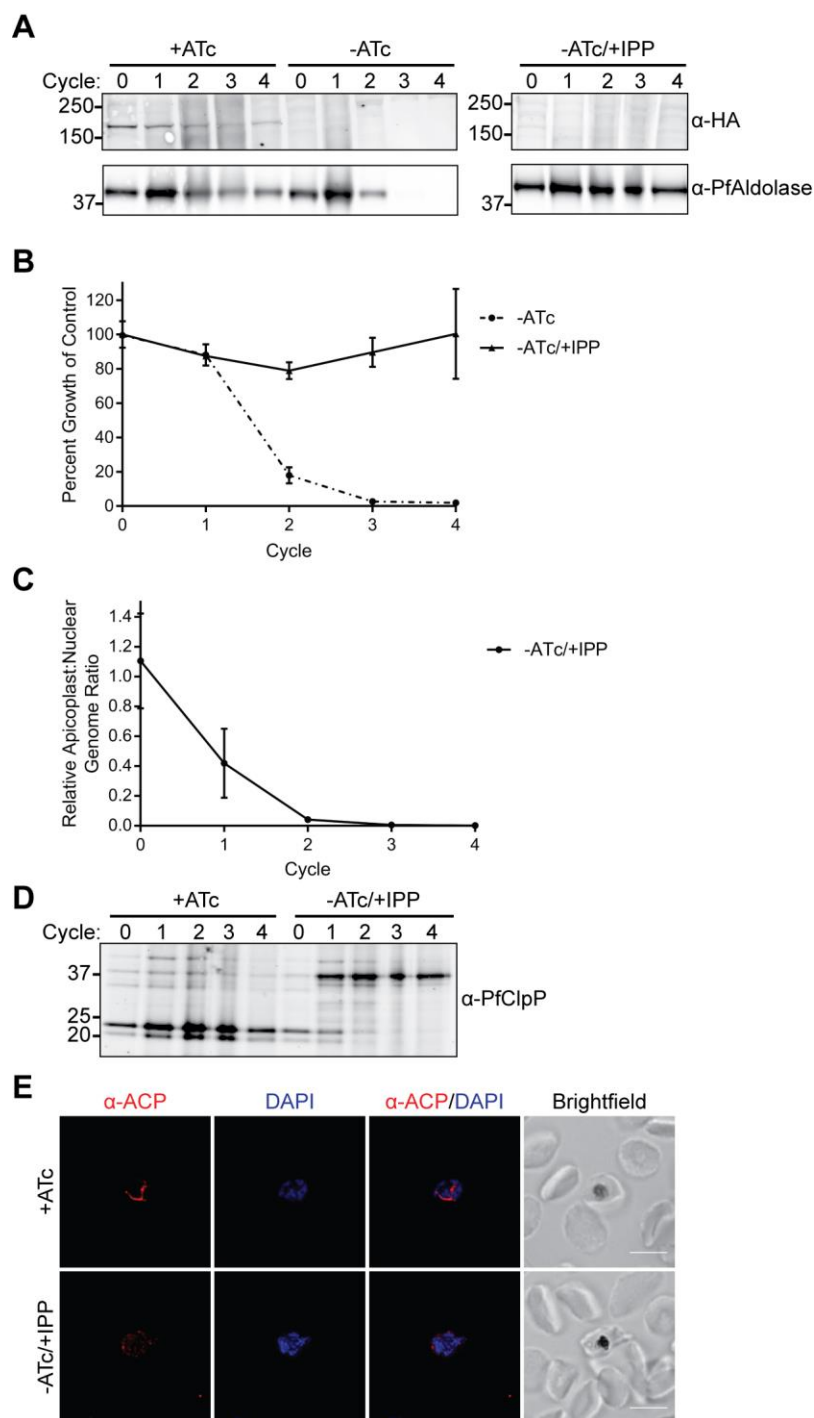

773

774 **Figure 7. ABCF1 is an essential apicoplast protein required for organelle biogenesis.**

775 ABCF1-3xHA knockdown parasites were grown in the presence of ATc (+ATc), the absence of

776 ATc (-ATc), or the absence of ATc with IPP supplementation (-ATc/+IPP) for 4 growth cycles.

777 (A) ABCF1-HA expression. (B) Parasite growth. At each time point, data are normalized to the



778 untreated (+ATc) control. Error bars represent standard deviation of the mean of two biological  
779 replicates. (C) Apicoplast:nuclear genome ratio. At each time point, data are normalized to the  
780 untreated (+ATc) control. Error bars represent standard deviation of the mean of two biological  
781 replicates, each performed in technical triplicate. (D) ClpP processing. (E) ACP localization after  
782 2 cycles of knockdown. See also Figure S4.

783

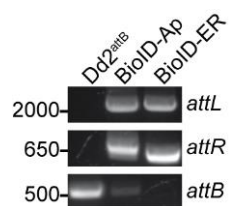

784

785 **Figure S1, Related to Figure 1. Integration of BioID-Ap and BioID-ER constructs into**

786 **Dd2<sup>attB</sup> parasites. PCR products showing integrated *attL* and *attR* sites or unintegrated *attB* site.**

787

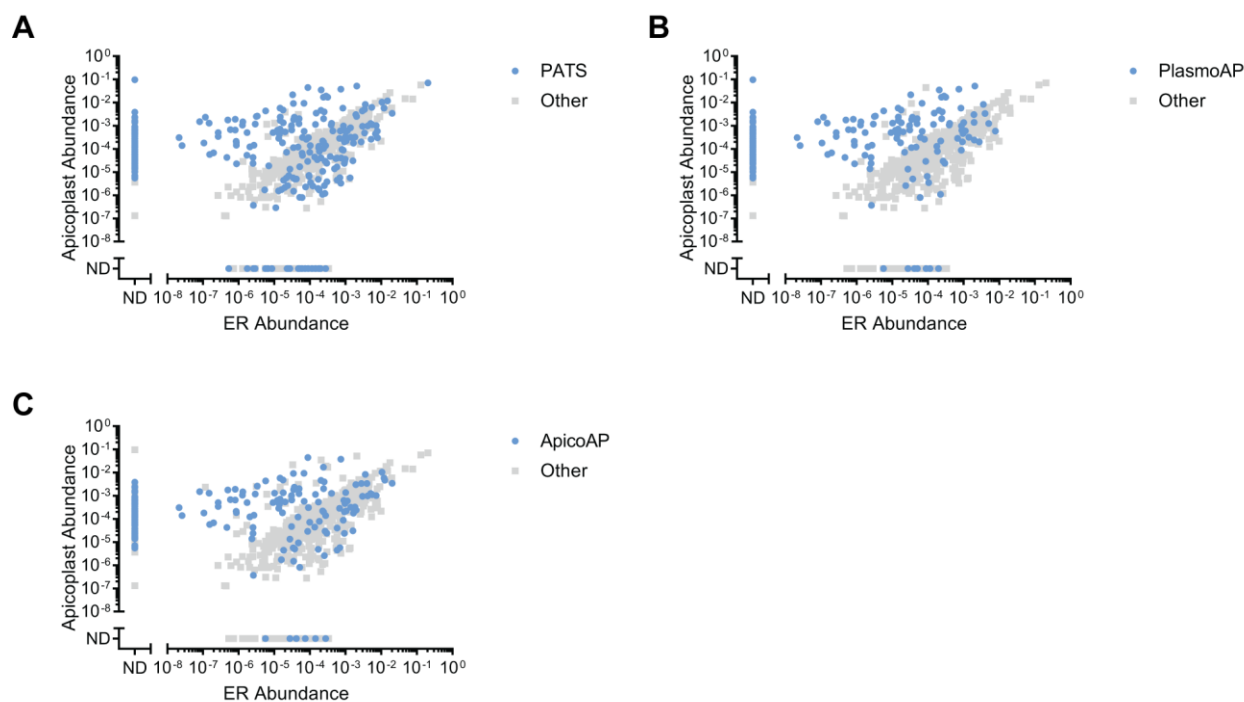

788

789 **Figure S2, Related to Figure 2. Bioinformatically predicted apicoplast proteins are not**  
 790 **clearly distinguishable based on apicoplast:ER abundance ratio.** Proteins predicted to  
 791 localize to the apicoplast by (A) PATS, (B) PlasmAP, or (C) ApicoAP are highlighted in each  
 792 graph. Data points are identical to those in Figure 2A.  
 793

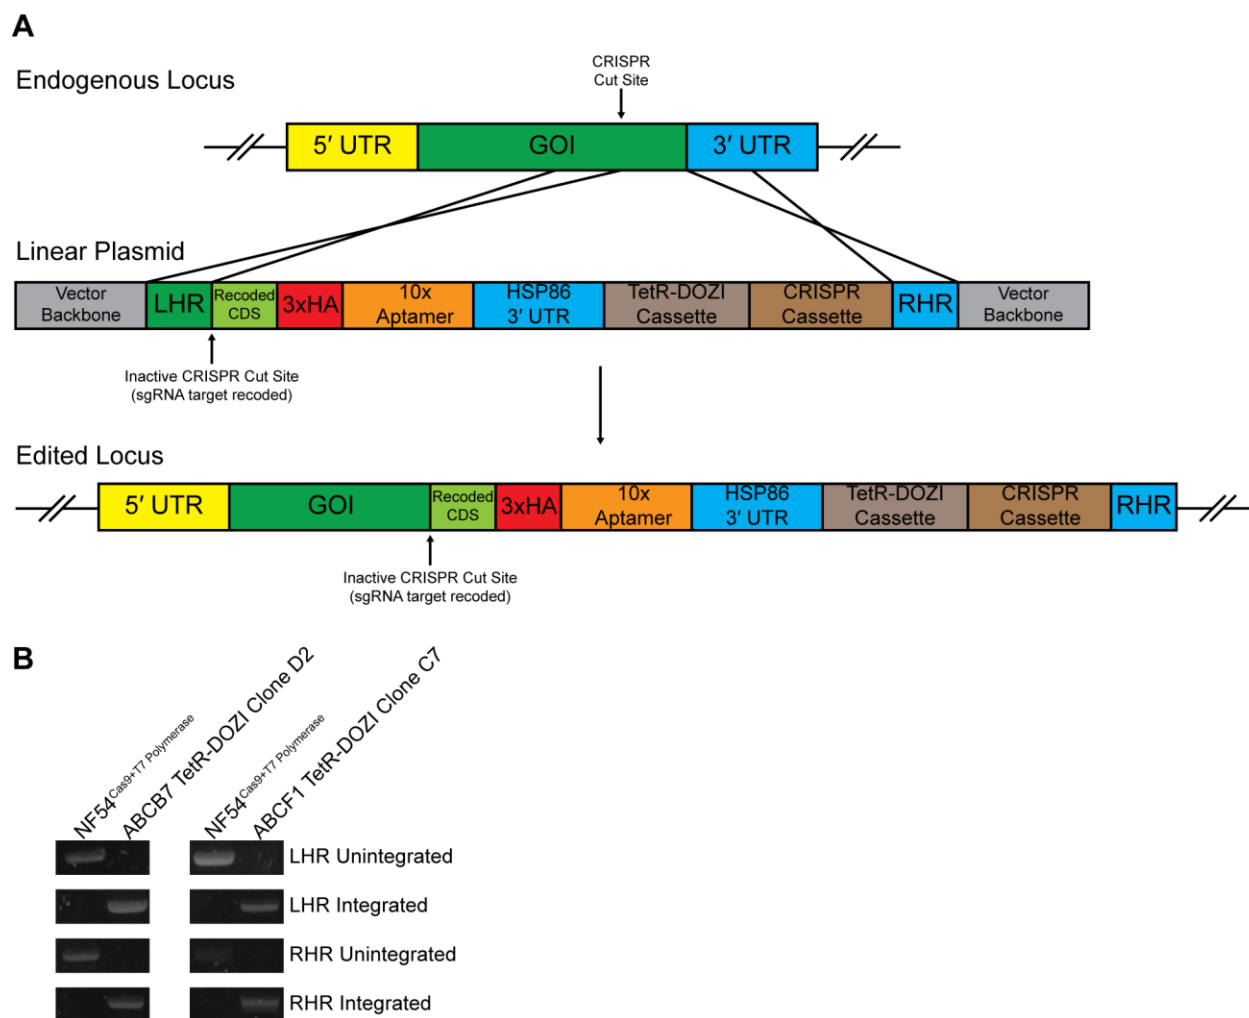

794

795 **Figure S3, Related to Figure 6. Generation of ABCB7 and ABCF1 TetR-DOZI conditional**  
 796 **knockdown cell lines.** (A) Schematic of CRISPR-Cas9-based endogenous editing to generate  
 797 conditional knockdown cell lines. GOI, gene of interest; LHR, left homology region; RHR, right

798 homology region. (B) PCR products showing integrated or unintegrated LHR and RHR sites in  
799 parental NF54<sup>Cas9+T7 Polymerase</sup> or clonal genome-edited parasites.  
800

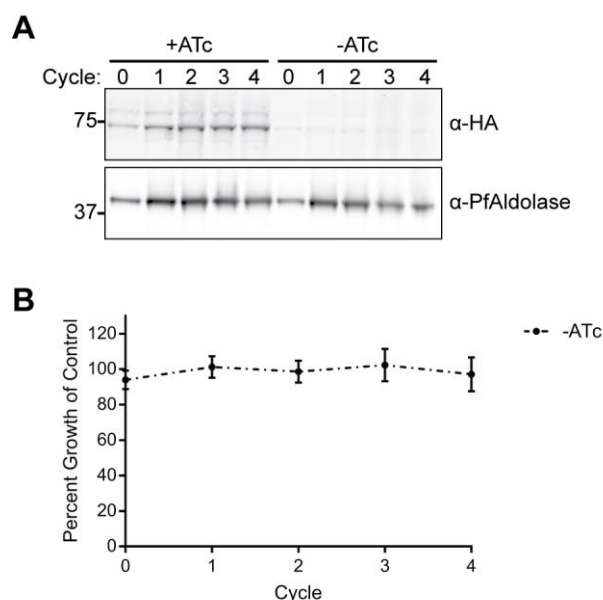

801  
802 **Figure S4, Related to Figure 7. Knockdown of ABCB7 does not cause growth inhibition.**  
803 ABCB7-3xHA knockdown parasites were grown in the presence of ATc (+ATc) or the absence  
804 of ATc (-ATc) for 4 growth cycles. (A) ABCB7-HA expression. (B) Parasite growth. At each  
805 time point, data are normalized to the untreated (+ATc) control. Error bars represent standard  
806 deviation of the mean of two biological replicates.  
807 **Table S1, Related to Figures 2, 3, and 5.** Abundances of 728 *P. falciparum* proteins identified  
808 by mass spectrometry in  $\geq 2$  biological replicates and with  $\geq 2$  unique peptides in at least one mass  
809 spectrometry run.  
810 **Table S2, Related to Figures 2-4.** Positive and negative control apicoplast proteins used in this  
811 study.  
812 **Table S3, Related to Figures 2 and 4.** Proteins predicted to localize to the apicoplast by PATS,  
813 PlasmoAP, and ApicoAP.

814 **Table S4, Related to Figure 4.** Positive training set used to develop PlastNN.

815 **Table S5, Related to Figure 4.** Layer dimensions for PlastNN neural network.

| Layer                | Input | Hidden 1 | Hidden 2 | Hidden 3 | Output  |
|----------------------|-------|----------|----------|----------|---------|
| <b>Dimension</b>     | 28    | 64       | 64       | 16       | 2       |
| <b>Non-linearity</b> | -     | ReLU     | ReLU     | ReLU     | Softmax |

816

817 **Table S6, Related to Figure 4.** Performance of different models in cross-validation.

| Model               | Features                               | Hyperparameters               | Accuracy |      | Sensitivity |      | PPV  |      |
|---------------------|----------------------------------------|-------------------------------|----------|------|-------------|------|------|------|
|                     |                                        |                               | Mean     | SD   | Mean        | SD   | Mean | SD   |
| Logistic regression | Amino acid frequencies                 |                               | 0.88     | 0.04 | 0.79        | 0.09 | 0.84 | 0.08 |
| Logistic regression | Amino acid frequencies + transcriptome | LASSO penalty; lambda = 0.005 | 0.91     | 0.03 | 0.85        | 0.06 | 0.87 | 0.05 |
| Neural network      | Amino acid frequencies                 | L2 regularization; 0.05       | 0.91     | 0.02 | 0.83        | 0.09 | 0.87 | 0.08 |
| Neural network      | Amino acid frequencies + transcriptome | Learning rate = 0.001         | 0.96     | 0.03 | 0.95        | 0.05 | 0.94 | 0.04 |

818

819 **Table S7, Related to Figures 4 and 5.** Results of PlastNN prediction algorithm.

820 **Table S8, Related to Figure 5.** Compiled list of 346 candidate apicoplast proteins based on

821 localization in the published literature, BioID, and PlastNN.

822 **Table S9, Related to Figures 1 and 6.** Primer and gBlock sequences used in this study.

823

824 **References**

- 825 Agrawal, S., Chung, D.W., Ponts, N., van Dooren, G.G., Prudhomme, J., Brooks, C.F.,  
826 Rodrigues, E.M., Tan, J.C., Ferdig, M.T., Striepen, B., *et al.* (2013). An apicoplast localized  
827 ubiquitylation system is required for the import of nuclear-encoded plastid proteins. *PLOS*  
828 *Pathog.* *9*, e1003426.
- 829  
830 Agrawal, S., van Dooren, G.G., Beatty, W.L., and Striepen, B. (2009). Genetic evidence that an  
831 endosymbiont-derived endoplasmic reticulum-associated protein degradation (ERAD) system  
832 functions in import of apicoplast proteins. *J. Biol. Chem.* *284*, 33683-33691.
- 833  
834 Amberg-Johnson, K., Hari, S.B., Ganesan, S.M., Lorenzi, H.A., Sauer, R.T., Niles, J.C., and  
835 Yeh, E. (2017). Small molecule inhibition of apicomplexan FtsH1 disrupts plastid biogenesis in  
836 human pathogens. *eLife* *6*, e29865.
- 837  
838 Aurrecoechea, C., Barreto, A., Basenko, E.Y., Brestelli, J., Brunk, B.P., Cade, S., Crouch, K.,  
839 Doherty, R., Falke, D., Fischer, S., *et al.* (2017). EuPathDB: the eukaryotic pathogen genomics  
840 database resource. *Nucleic Acids Res.* *45*, D581-D591.
- 841  
842 Balabaskaran Nina, P., Morrisey, J.M., Ganesan, S.M., Ke, H., Pershing, A.M., Mather, M.W.,  
843 and Vaidya, A.B. (2011). ATP synthase complex of *Plasmodium falciparum*: dimeric assembly  
844 in mitochondrial membranes and resistance to genetic disruption. *J. Biol. Chem.* *286*, 41312-  
845 41322.
- 846  
847 Bartfai, R., Hoeijmakers, W.A., Salcedo-Amaya, A.M., Smits, A.H., Janssen-Megens, E., Kaan,  
848 A., Treeck, M., Gilberger, T.W., Francoijs, K.J., and Stunnenberg, H.G. (2010). H2A.Z  
849 demarcates intergenic regions of the *Plasmodium falciparum* epigenome that are dynamically  
850 marked by H3K9ac and H3K4me3. *PLOS Pathog.* *6*, e1001223.
- 851  
852 Bendtsen, J.D., Nielsen, H., von Heijne, G., and Brunak, S. (2004). Improved prediction of  
853 signal peptides: SignalP 3.0. *J. Mol. Biol.* *340*, 783-795.
- 854  
855 Boel, G., Smith, P.C., Ning, W., Englander, M.T., Chen, B., Hashem, Y., Testa, A.J., Fischer,  
856 J.J., Wieden, H.J., Frank, J., *et al.* (2014). The ABC-F protein EttA gates ribosome entry into the  
857 translation elongation cycle. *Nat. Struct. Mol. Biol.* *21*, 143-151.
- 858  
859 Bozdech, Z., Llinas, M., Pulliam, B.L., Wong, E.D., Zhu, J., and DeRisi, J.L. (2003). The  
860 transcriptome of the intraerythrocytic developmental cycle of *Plasmodium falciparum*. *PLOS*  
861 *Biol.* *1*, E5.
- 862  
863 Bushell, E., Gomes, A.R., Sanderson, T., Anar, B., Girling, G., Herd, C., Metcalf, T.,  
864 Modrzynska, K., Schwach, F., Martin, R.E., *et al.* (2017). Functional profiling of a *Plasmodium*  
865 genome reveals an abundance of essential genes. *Cell* *170*, 260-272.
- 866  
867 Chen, A.L., Kim, E.W., Toh, J.Y., Vashisht, A.A., Rashoff, A.Q., Van, C., Huang, A.S., Moon,  
868 A.S., Bell, H.N., Bentolila, L.A., *et al.* (2015). Novel components of the *Toxoplasma* inner  
869 membrane complex revealed by BioID. *mBio* *6*, e02357-14.
- 870

- 871 Chen, A.L., Moon, A.S., Bell, H.N., Huang, A.S., Vashisht, A.A., Toh, J.Y., Lin, A.H.,  
872 Nadipuram, S.M., Kim, E.W., Choi, C.P., *et al.* (2017). Novel insights into the composition and  
873 function of the *Toxoplasma* IMC sutures. *Cell. Microbiol.* *19*, e12678.  
874
- 875 Chen, B., Boel, G., Hashem, Y., Ning, W., Fei, J., Wang, C., Gonzalez, R.L., Jr., Hunt, J.F., and  
876 Frank, J. (2014). EttA regulates translation by binding the ribosomal E site and restricting  
877 ribosome-tRNA dynamics. *Nat. Struct. Mol. Biol.* *21*, 152-159.  
878
- 879 Chen, F., Mackey, A.J., Stoeckert, C.J., Jr., and Roos, D.S. (2006). OrthoMCL-DB: querying a  
880 comprehensive multi-species collection of ortholog groups. *Nucleic Acids Res.* *34*, D363-D368.  
881
- 882 Cilingir, G., Broschat, S.L., and Lau, A.O. (2012). ApicoAP: the first computational model for  
883 identifying apicoplast-targeted proteins in multiple species of Apicomplexa. *PLOS ONE* *7*,  
884 e36598.  
885
- 886 Dahl, E.L., and Rosenthal, P.J. (2007). Multiple antibiotics exert delayed effects against the  
887 *Plasmodium falciparum* apicoplast. *Antimicrob. Agents Chemother.* *51*, 3485-3490.  
888
- 889 Dahl, E.L., Shock, J.L., Shenai, B.R., Gut, J., DeRisi, J.L., and Rosenthal, P.J. (2006).  
890 Tetracyclines specifically target the apicoplast of the malaria parasite *Plasmodium falciparum*.  
891 *Antimicrob. Agents Chemother.* *50*, 3124-3131.  
892
- 893 Dang, H.Q., Zhou, Q., Rowlett, V.W., Hu, H., Lee, K.J., Margolin, W., and Li, Z. (2017).  
894 Proximity interactions among basal body components in *Trypanosoma brucei* identify novel  
895 regulators of basal body biogenesis and inheritance. *mBio* *8*, e02120-16.  
896
- 897 Dean, M., and Annilo, T. (2005). Evolution of the ATP-binding cassette (ABC) transporter  
898 superfamily in vertebrates. *Annu. Rev. Genomics Hum. Genet.* *6*, 123-142.  
899
- 900 Deitsch, K., Driskill, C., and Wellems, T. (2001). Transformation of malaria parasites by the  
901 spontaneous uptake and expression of DNA from human erythrocytes. *Nucleic Acids Res.* *29*,  
902 850-853.  
903
- 904 El Bakkouri, M., Pow, A., Mulichak, A., Cheung, K.L., Artz, J.D., Amani, M., Fell, S., de  
905 Koning-Ward, T.F., Goodman, C.D., McFadden, G.I., *et al.* (2010). The Clp chaperones and  
906 proteases of the human malaria parasite *Plasmodium falciparum*. *J. Mol. Biol.* *404*, 456-477.  
907
- 908 Elias, J.E., and Gygi, S.P. (2007). Target-decoy search strategy for increased confidence in large-  
909 scale protein identifications by mass spectrometry. *Nat. Methods* *4*, 207-214.  
910
- 911 Foth, B.J., Ralph, S.A., Tonkin, C.J., Struck, N.S., Fraunholz, M., Roos, D.S., Cowman, A.F.,  
912 and McFadden, G.I. (2003). Dissecting apicoplast targeting in the malaria parasite *Plasmodium*  
913 *falciparum*. *Science* *299*, 705-708.  
914

- 915 Gallagher, J.R., and Prigge, S.T. (2010). *Plasmodium falciparum* acyl carrier protein crystal  
916 structures in disulfide-linked and reduced states and their prevalence during blood stage growth.  
917 *Proteins* 78, 575-588.
- 918
- 919 Ganesan, S.M., Falla, A., Goldfless, S.J., Nasamu, A.S., and Niles, J.C. (2016). Synthetic RNA-  
920 protein modules integrated with native translation mechanisms to control gene expression in  
921 malaria parasites. *Nat. Commun.* 7, 10727.
- 922
- 923 Goldfless, S.J., Wagner, J.C., and Niles, J.C. (2014). Versatile control of *Plasmodium falciparum*  
924 gene expression with an inducible protein-RNA interaction. *Nat. Commun.* 5, 5329.
- 925
- 926 Goodman, C.D., Su, V., and McFadden, G.I. (2007). The effects of anti-bacterials on the malaria  
927 parasite *Plasmodium falciparum*. *Mol. Biochem. Parasitol.* 152, 181-191.
- 928
- 929 Gupta, G.D., Coyaud, E., Goncalves, J., Mojarad, B.A., Liu, Y., Wu, Q., Gheiratmand, L.,  
930 Comartin, D., Tkach, J.M., Cheung, S.W., *et al.* (2015). A dynamic protein interaction landscape  
931 of the human centrosome-cilium interface. *Cell* 163, 1484-1499.
- 932
- 933 Hung, V., Lam, S.S., Udeshi, N.D., Svinkina, T., Guzman, G., Mootha, V.K., Carr, S.A., and  
934 Ting, A.Y. (2017). Proteomic mapping of cytosol-facing outer mitochondrial and ER membranes  
935 in living human cells by proximity biotinylation. *eLife* 6, e24463.
- 936
- 937 Hung, V., Zou, P., Rhee, H.W., Udeshi, N.D., Cracan, V., Svinkina, T., Carr, S.A., Mootha,  
938 V.K., and Ting, A.Y. (2014). Proteomic mapping of the human mitochondrial intermembrane  
939 space in live cells via ratiometric APEX tagging. *Mol. Cell* 55, 332-341.
- 940
- 941 Huttlin, E.L., Jedrychowski, M.P., Elias, J.E., Goswami, T., Rad, R., Beausoleil, S.A., Villen, J.,  
942 Haas, W., Sowa, M.E., and Gygi, S.P. (2010). A tissue-specific atlas of mouse protein  
943 phosphorylation and expression. *Cell* 143, 1174-1189.
- 944
- 945 Jomaa, H., Wiesner, J., Sanderbrand, S., Altincicek, B., Weidemeyer, C., Hintz, M., Turbachova,  
946 I., Eberl, M., Zeidler, J., Lichtenthaler, H.K., *et al.* (1999). Inhibitors of the nonmevalonate  
947 pathway of isoprenoid biosynthesis as antimalarial drugs. *Science* 285, 1573-1576.
- 948
- 949 Kalanon, M., Tonkin, C.J., and McFadden, G.I. (2009). Characterization of two putative protein  
950 translocation components in the apicoplast of *Plasmodium falciparum*. *Eukaryot. Cell* 8, 1146-  
951 1154.
- 952
- 953 Ke, H., Sigala, P.A., Miura, K., Morrissey, J.M., Mather, M.W., Crowley, J.R., Henderson, J.P.,  
954 Goldberg, D.E., Long, C.A., and Vaidya, A.B. (2014). The heme biosynthesis pathway is  
955 essential for *Plasmodium falciparum* development in mosquito stage but not in blood stages. *J.*  
956 *Biol. Chem.* 289, 34827-34837.
- 957
- 958 Kerr, I.D. (2004). Sequence analysis of twin ATP binding cassette proteins involved in  
959 translational control, antibiotic resistance, and ribonuclease L inhibition. *Biochem. Biophys. Res.*  
960 *Commun.* 315, 166-173.

961  
962 Khosh-Naucke, M., Becker, J., Mesen-Ramirez, P., Kiani, P., Birnbaum, J., Frohlike, U.,  
963 Jonscher, E., Schluter, H., and Spielmann, T. (2018). Identification of novel parasitophorous  
964 vacuole proteins in *P. falciparum* parasites using BioID. *Int. J. Med. Microbiol.* *308*, 13-24.  
965  
966 Kim, D.I., Birendra, K.C., Zhu, W., Motamedchaboki, K., Doye, V., and Roux, K.J. (2014).  
967 Probing nuclear pore complex architecture with proximity-dependent biotinylation. *Proc. Natl.*  
968 *Acad. Sci. U.S.A.* *111*, E2453-E2461.  
969  
970 Kohler, S., Delwiche, C.F., Denny, P.W., Tilney, L.G., Webster, P., Wilson, R.J., Palmer, J.D.,  
971 and Roos, D.S. (1997). A plastid of probable green algal origin in Apicomplexan parasites.  
972 *Science* *275*, 1485-1489.  
973  
974 Lau, J.B., Stork, S., Moog, D., Schulz, J., and Maier, U.G. (2016). Protein-protein interactions  
975 indicate composition of a 480 kDa SELMA complex in the second outermost membrane of  
976 diatom complex plastids. *Mol. Microbiol.* *100*, 76-89.  
977  
978 Loh, K.H., Stawski, P.S., Draycott, A.S., Udeshi, N.D., Lehrman, E.K., Wilton, D.K., Svinkina,  
979 T., Deerinck, T.J., Ellisman, M.H., Stevens, B., *et al.* (2016). Proteomic analysis of unbounded  
980 cellular compartments: synaptic clefts. *Cell* *166*, 1295-1307.  
981  
982 Marton, M.J., Vazquez de Aldana, C.R., Qiu, H., Chakraborty, K., and Hinnebusch, A.G.  
983 (1997). Evidence that GCN1 and GCN20, translational regulators of *GCN4*, function on  
984 elongating ribosomes in activation of eIF2alpha kinase GCN2. *Mol. Cell. Biol.* *17*, 4474-4489.  
985  
986 McFadden, G.I., Reith, M.E., Munholland, J., and Lang-Unnasch, N. (1996). Plastid in human  
987 parasites. *Nature* *381*, 482.  
988  
989 Morriswood, B., Havlicek, K., Demmel, L., Yavuz, S., Sealey-Cardona, M., Vidilaseris, K.,  
990 Anrather, D., Kostan, J., Djinojic-Carugo, K., Roux, K.J., *et al.* (2013). Novel bilobe  
991 components in *Trypanosoma brucei* identified using proximity-dependent biotinylation.  
992 *Eukaryot. Cell* *12*, 356-367.  
993  
994 Mullin, K.A., Lim, L., Ralph, S.A., Spurck, T.P., Handman, E., and McFadden, G.I. (2006).  
995 Membrane transporters in the relict plastid of malaria parasites. *Proc. Natl. Acad. Sci. U.S.A.*  
996 *103*, 9572-9577.  
997  
998 Nadipuram, S.M., Kim, E.W., Vashisht, A.A., Lin, A.H., Bell, H.N., Coppens, I., Wohlschlegel,  
999 J.A., and Bradley, P.J. (2016). *In vivo* biotinylation of the *Toxoplasma* parasitophorous vacuole  
1000 reveals novel dense granule proteins important for parasite growth and pathogenesis. *mBio* *7*,  
1001 e00808-16.  
1002  
1003 Nagaraj, V.A., Sundaram, B., Varadarajan, N.M., Subramani, P.A., Kalappa, D.M., Ghosh, S.K.,  
1004 and Padmanaban, G. (2013). Malaria parasite-synthesized heme is essential in the mosquito and  
1005 liver stages and complements host heme in the blood stages of infection. *PLOS Pathog.* *9*,  
1006 e1003522.



1007  
1008 Nkrumah, L.J., Muhle, R.A., Moura, P.A., Ghosh, P., Hatfull, G.F., Jacobs, W.R., Jr., and  
1009 Fidock, D.A. (2006). Efficient site-specific integration in *Plasmodium falciparum* chromosomes  
1010 mediated by mycobacteriophage Bxb1 integrase. *Nat. Methods* 3, 615-621.  
1011  
1012 Parsons, M., Karnataki, A., Feagin, J.E., and DeRocher, A. (2007). Protein trafficking to the  
1013 apicoplast: deciphering the apicomplexan solution to secondary endosymbiosis. *Eukaryot. Cell* 6,  
1014 1081-1088.  
1015  
1016 Paytubi, S., Wang, X., Lam, Y.W., Izquierdo, L., Hunter, M.J., Jan, E., Hundal, H.S., and Proud,  
1017 C.G. (2009). ABC50 promotes translation initiation in mammalian cells. *J. Biol. Chem.* 284,  
1018 24061-24073.  
1019  
1020 Pei, Y., Tarun, A.S., Vaughan, A.M., Herman, R.W., Soliman, J.M., Erickson-Wayman, A., and  
1021 Kappe, S.H. (2010). *Plasmodium* pyruvate dehydrogenase activity is only essential for the  
1022 parasite's progression from liver infection to blood infection. *Mol. Microbiol.* 75, 957-971.  
1023  
1024 Ralph, S.A., van Dooren, G.G., Waller, R.F., Crawford, M.J., Fraunholz, M.J., Foth, B.J.,  
1025 Tonkin, C.J., Roos, D.S., and McFadden, G.I. (2004). Tropical infectious diseases: metabolic  
1026 maps and functions of the *Plasmodium falciparum* apicoplast. *Nat. Rev. Microbiol.* 2, 203-216.  
1027  
1028 Rhee, H.W., Zou, P., Udeshi, N.D., Martell, J.D., Mootha, V.K., Carr, S.A., and Ting, A.Y.  
1029 (2013). Proteomic mapping of mitochondria in living cells via spatially restricted enzymatic  
1030 tagging. *Science* 339, 1328-1331.  
1031  
1032 Roux, K.J., Kim, D.I., Raida, M., and Burke, B. (2012). A promiscuous biotin ligase fusion  
1033 protein identifies proximal and interacting proteins in mammalian cells. *J. Cell Biol.* 196, 801-  
1034 810.  
1035  
1036 Sayers, C.P., Mollard, V., Buchanan, H.D., McFadden, G.I., and Goodman, C.D. (2018). A  
1037 genetic screen in rodent malaria parasites identifies five new apicoplast putative membrane  
1038 transporters, one of which is essential in human malaria parasites. *Cell. Microbiol.* 20, e12789.  
1039  
1040 Schnider, C.B., Bausch-Fluck, D., Bruhlmann, F., Heussler, V.T., and Burda, P.C. (2018). BioID  
1041 reveals novel proteins of the *Plasmodium* parasitophorous vacuole membrane. *mSphere* 3,  
1042 e00522-17.  
1043  
1044 Sheiner, L., Demerly, J.L., Poulsen, N., Beatty, W.L., Lucas, O., Behnke, M.S., White, M.W.,  
1045 and Striepen, B. (2011). A systematic screen to discover and analyze apicoplast proteins  
1046 identifies a conserved and essential protein import factor. *PLOS Pathog.* 7, e1002392.  
1047  
1048 Sheiner, L., Vaidya, A.B., and McFadden, G.I. (2013). The metabolic roles of the endosymbiotic  
1049 organelles of *Toxoplasma* and *Plasmodium* spp. *Curr. Opin. Microbiol.* 16, 452-458.  
1050

- 1051 Sidik, S.M., Huet, D., Ganesan, S.M., Huynh, M.H., Wang, T., Nasamu, A.S., Thiru, P., Saeij,  
1052 J.P., Carruthers, V.B., Niles, J.C., *et al.* (2016). A genome-wide CRISPR screen in *Toxoplasma*  
1053 identifies essential apicomplexan genes. *Cell* *166*, 1423-1435.
- 1054  
1055 Spork, S., Hiss, J.A., Mandel, K., Sommer, M., Kooij, T.W., Chu, T., Schneider, G., Maier,  
1056 U.G., and Przyborski, J.M. (2009). An unusual ERAD-like complex is targeted to the apicoplast  
1057 of *Plasmodium falciparum*. *Eukaryot. Cell* *8*, 1134-1145.
- 1058  
1059 Stanway, R.R., Witt, T., Zobiak, B., Aepfelbacher, M., and Heussler, V.T. (2009). GFP-targeting  
1060 allows visualization of the apicoplast throughout the life cycle of live malaria parasites. *Biol.*  
1061 *Cell* *101*, 415-430.
- 1062  
1063 Tonkin, C.J., van Dooren, G.G., Spurck, T.P., Struck, N.S., Good, R.T., Handman, E., Cowman,  
1064 A.F., and McFadden, G.I. (2004). Localization of organellar proteins in *Plasmodium falciparum*  
1065 using a novel set of transfection vectors and a new immunofluorescence fixation method. *Mol.*  
1066 *Biochem. Parasitol.* *137*, 13-21.
- 1067  
1068 Tyzack, J.K., Wang, X., Belsham, G.J., and Proud, C.G. (2000). ABC50 interacts with  
1069 eukaryotic initiation factor 2 and associates with the ribosome in an ATP-dependent manner. *J.*  
1070 *Biol. Chem.* *275*, 34131-34139.
- 1071  
1072 van Dooren, G.G., and Striepen, B. (2013). The algal past and parasite present of the apicoplast.  
1073 *Annu. Rev. Microbiol.* *67*, 271-289.
- 1074  
1075 van Dooren, G.G., Su, V., D'Ombra, M.C., and McFadden, G.I. (2002). Processing of an  
1076 apicoplast leader sequence in *Plasmodium falciparum* and the identification of a putative leader  
1077 cleavage enzyme. *J. Biol. Chem.* *277*, 23612-23619.
- 1078  
1079 Vaughan, A.M., O'Neill, M.T., Tarun, A.S., Camargo, N., Phuong, T.M., Aly, A.S., Cowman,  
1080 A.F., and Kappe, S.H. (2009). Type II fatty acid synthesis is essential only for malaria parasite  
1081 late liver stage development. *Cell. Microbiol.* *11*, 506-520.
- 1082  
1083 Vazquez de Aldana, C.R., Marton, M.J., and Hinnebusch, A.G. (1995). GCN20, a novel ATP  
1084 binding cassette protein, and GCN1 reside in a complex that mediates activation of the eIF-2  
1085 alpha kinase GCN2 in amino acid-starved cells. *EMBO J.* *14*, 3184-3199.
- 1086  
1087 Wagner, J.C., Platt, R.J., Goldfless, S.J., Zhang, F., and Niles, J.C. (2014). Efficient CRISPR-  
1088 Cas9-mediated genome editing in *Plasmodium falciparum*. *Nat. Methods* *11*, 915-918.
- 1089  
1090 Waller, R.F., Keeling, P.J., Donald, R.G., Striepen, B., Handman, E., Lang-Unnasch, N.,  
1091 Cowman, A.F., Besra, G.S., Roos, D.S., and McFadden, G.I. (1998). Nuclear-encoded proteins  
1092 target to the plastid in *Toxoplasma gondii* and *Plasmodium falciparum*. *Proc. Natl. Acad. Sci.*  
1093 *U.S.A.* *95*, 12352-12357.
- 1094  
1095 Waller, R.F., Reed, M.B., Cowman, A.F., and McFadden, G.I. (2000). Protein trafficking to the  
1096 plastid of *Plasmodium falciparum* is via the secretory pathway. *EMBO J.* *19*, 1794-1802.

1097  
1098 Wu, W., Herrera, Z., Ebert, D., Baska, K., Cho, S.H., DeRisi, J.L., and Yeh, E. (2015). A  
1099 chemical rescue screen identifies a *Plasmodium falciparum* apicoplast inhibitor targeting MEP  
1100 isoprenoid precursor biosynthesis. *Antimicrob. Agents Chemother.* 59, 356-364.  
1101  
1102 Yeh, E., and DeRisi, J.L. (2011). Chemical rescue of malaria parasites lacking an apicoplast  
1103 defines organelle function in blood-stage *Plasmodium falciparum*. *PLOS Biol.* 9, e1001138.  
1104  
1105 Yu, M., Kumar, T.R., Nkrumah, L.J., Coppi, A., Retzlaff, S., Li, C.D., Kelly, B.J., Moura, P.A.,  
1106 Lakshmanan, V., Freundlich, J.S., *et al.* (2008). The fatty acid biosynthesis enzyme FabI plays a  
1107 key role in the development of liver-stage malarial parasites. *Cell Host Microbe* 4, 567-578.  
1108  
1109 Zuegge, J., Ralph, S., Schmuker, M., McFadden, G.I., and Schneider, G. (2001). Deciphering  
1110 apicoplast targeting signals--feature extraction from nuclear-encoded precursors of *Plasmodium*  
1111 *falciparum* apicoplast proteins. *Gene* 280, 19-26.  
1112
